# Supplementary material for: Timing of two versus three doses of quadrivalent HPV vaccine and associated effectiveness against condyloma in Sweden: a nationwide cohort study
Source: PubMed Central journal article supplement — BMJ Open. 2017 Jun 8;7(6):e015021. doi: 10.1136/bmjopen-2016-015021 (PMC5734289; doi:10.1136/bmjopen-2016-015021), 2017-06-08
Supplement: bmjopen-2016-015021.draft_revisions.pdf [file bmjopen-2016-015021.draft_revisions.pdf]

# BMJ Open

## TIMING OF TWO VERSUS THREE DOSES OF QUADRIVALENT HPV VACCINE AND ASSOCIATED EFFECTIVENESS AGAINST CONDYLOMA IN SWEDEN: A NATIONWIDE COHORT STUDY.

|                                 |                                                                                                                                                                                                                                                                                                                                                                                                                                                                                                                                                    |
|---------------------------------|----------------------------------------------------------------------------------------------------------------------------------------------------------------------------------------------------------------------------------------------------------------------------------------------------------------------------------------------------------------------------------------------------------------------------------------------------------------------------------------------------------------------------------------------------|
| Journal:                        | <i>BMJ Open</i>                                                                                                                                                                                                                                                                                                                                                                                                                                                                                                                                    |
| Manuscript ID                   | bmjopen-2016-015021                                                                                                                                                                                                                                                                                                                                                                                                                                                                                                                                |
| Article Type:                   | Research                                                                                                                                                                                                                                                                                                                                                                                                                                                                                                                                           |
| Date Submitted by the Author:   | 03-Nov-2016                                                                                                                                                                                                                                                                                                                                                                                                                                                                                                                                        |
| Complete List of Authors:       | Lamb, Favelle; Karolinska Institutet, Medical Epidemiology and Biostatistics<br>Herweijer, Eva; Karolinska Institutet, Medical Epidemiology and Biostatistics<br>Ploner, Alexander; Karolinska Institutet, Medical Epidemiology and Biostatistics<br>Uhnöo, Ingrid; Folkhälsomyndigheten<br>Sundström, Karin; Karolinska Institutet, Medical Epidemiology and Biostatistics<br>Sparén, Pär; Karolinska Institutet, Medical Epidemiology and Biostatistics<br>Arnhem-Dahlström, Lisen; Karolinska institute, Medical Epidemiology and Biostatistics |
| <b>Primary Subject Heading</b>: | Epidemiology                                                                                                                                                                                                                                                                                                                                                                                                                                                                                                                                       |
| Secondary Subject Heading:      | Public health, Infectious diseases                                                                                                                                                                                                                                                                                                                                                                                                                                                                                                                 |
| Keywords:                       | INFECTIOUS DISEASES, EPIDEMIOLOGY, PREVENTIVE MEDICINE, PUBLIC HEALTH                                                                                                                                                                                                                                                                                                                                                                                                                                                                              |
|                                 |                                                                                                                                                                                                                                                                                                                                                                                                                                                                                                                                                    |

SCHOLARONE™  
Manuscripts

1  
2  
3 **TIMING OF TWO VERSUS THREE DOSES OF QUADRIVALENT HPV**  
4 **VACCINE AND ASSOCIATED EFFECTIVENESS AGAINST CONDYLOMA**  
5 **IN SWEDEN: A NATIONWIDE COHORT STUDY.**  
6  
7  
8

9 Lamb F<sup>1</sup>, Herweijer E<sup>1</sup>, Ploner A<sup>2</sup>, Uhnöo I<sup>3</sup>, Sundström K<sup>4</sup>, Sparén P<sup>5\*</sup>, Arnheim-  
10 Dahlström L<sup>6</sup>  
11  
12

13  
14  
15  
16 <sup>1</sup> PhD Student, Karolinska Institutet, Department of Medical Epidemiology and  
17 Biostatistics, Nobels Väg 12A, SE-171 77 Stockholm, Sweden  
18

19  
20  
21 <sup>2</sup> Senior Biostatistician, Karolinska Institutet, Department of Medical Epidemiology  
22 and Biostatistics, Nobels Väg 12A, SE-171 77 Stockholm, Sweden  
23

24  
25 <sup>3</sup> Senior Expert, Associate Professor, Public Health Agency of Sweden, 171 82,  
26 Solna, Stockholm, Sweden  
27

28  
29 <sup>4</sup> PhD and MD, Karolinska Institutet, Department of Laboratory Medicine, Alfreds  
30 Nobels Allé 8, 141 83, Stockholm, Sweden  
31

32  
33  
34 <sup>5</sup> Professor, Karolinska Institutet, Department of Medical Epidemiology and  
35 Biostatistics, Nobels Väg 12A, SE-171 77 Stockholm, Sweden  
36

37  
38 <sup>6</sup> Associate Professor, Karolinska Institutet, Department of Medical Epidemiology  
39 and Biostatistics, Nobels Väg 12A, SE-171 77 Stockholm, Sweden  
40  
41

42  
43  
44  
45 \*Correspondence to: Department of Medical Epidemiology and Biostatistics, Nobels  
46 Väg 12A, SE-171 77 Stockholm, Sweden. Email: par.sparen@ki.se, phone: +46  
47 852486102  
48  
49

50  
51  
52 Word count text: 2767

53  
54  
55 Word count abstract: 288  
56  
57  
58  
59  
60

## ABSTRACT

### Objective

To assess incidence of condyloma after two doses of quadrivalent HPV (qHPV)-vaccine, by time since first vaccine dose, in girls and women initiating vaccination before age 20.

**Design:** Register-based nationwide open cohort study

**Setting:** Sweden

**Participants:** Girls and women initiating qHPV vaccination before age 20 between 2006 and 2012. The study cohort included 264 498 girls, of whom 72 042 had received two doses of qHPV vaccine and 185 456 had received all 3 doses.

**Main outcome measure:** Incidence rate ratios (IRRs) of condyloma estimated by time between first and second dose of qHPV in months (m) and age at vaccination, adjusted for attained age.

**Results:** For girls first vaccinated with two doses before the age of 17, the IRR of condyloma for 0-3m between first and second dose was 1.96 (95% CI 1.43 to 2.68) as compared to standard three-dose schedule. The IRRs were 1.27 (95% CI 0.63 to 2.58) and 4.36 (95% CI=2.05 to 9.28) after receipt of two doses with 4-7m and 8+m between doses, respectively. For women first vaccinated after the age of 17, vaccination with two doses of qHPV vaccine and 0-3m between doses was associated with an IRR of 2.12 (95% CI=1.62 to 2.77). For an interval of 4-7m between doses, the IRR did not statistically significantly differ to the standard three-dose schedule (IRR=0.81, 95% CI= 0.36 to 1.84). For women with 8+m between dose one and two the IRR was 3.16 (95% CI=1.40 to 7.14).

### Conclusion

1  
2  
3 A two-dose schedule for qHPV vaccine with 4-7 months between first and second  
4  
5 dose may be as effective against condyloma in girls and women initiating vaccination  
6  
7 under 20 years as a three-dose schedule. Results from this nationwide study support  
8  
9 immunogenicity data from clinical trials.  
10

### 11 12 13 14 **Strengths and limitations of this study**

- 15  
16  
17  
18 • We were able to link vaccination status to disease outcome on an individual  
19  
20 level through use of high quality national register-based data.
- 21  
22  
23 • Observation studies such as this, are able to look at the pragmatic  
24  
25 effectiveness of vaccination in a large population.
- 26  
27  
28 • We did not look at HPV disease outcomes other than condyloma.
- 29  
30  
31 • The majority of girls and women in the cohort had 0-3 months between first  
32  
33 and second dose, which limited the power for other exposure groups in our  
34  
35 study.
- 36  
37  
38 • A small proportion of condyloma cases may have been missed, as some  
39  
40 patients will neither seek hospital care for condyloma nor receive prescription  
41  
42 for treatment, and thus will not be included in the registers.  
43  
44

45  
46 **Funding:** This study was supported by the Swedish Foundation for Strategic research  
47  
48 grant number KF10-0046. The funder had no role in the design and conduct of the  
49  
50 study; collection, management, analysis, and interpretation of the data; preparation,  
51  
52 review, and approval of manuscript or decision to submit the manuscript for  
53  
54 publication.  
55  
56  
57  
58  
59  
60

1  
2  
3 **Competing interests:** All authors have completed the ICMJE uniform disclosure  
4 form at [www.icmje.org/coi\\_disclosure.pdf](http://www.icmje.org/coi_disclosure.pdf) and declare: no support from any  
5 organisation for the submitted work; LAD has received research grants to her  
6 institution for other studies from MSD Sanofi Pasteur, Merck Sharp and Dohme, and  
7 GlaxoSmithKline. KS has received grants from Merck Sharp and Dohme for other  
8 studies on HPV vaccination in Sweden; no other relationships or activities that could  
9 appear to have influenced the submitted work.  
10  
11  
12  
13  
14  
15  
16  
17  
18  
19

20  
21 **Data sharing:** The study utilises unique individual level Swedish register data,  
22 which cannot be shared in the public domain according to Swedish law. The  
23 individual-level data underlying the study will be available from the corresponding  
24 author upon request, given that appropriate ethical and legal requirements are met.  
25  
26  
27  
28  
29  
30  
31

32 **Contributors:** FL, EH, AP, KS, IU, PS and LAD contributed to the design of the  
33 study; FL, EH, AP and PS analysed the data; FL drafted the manuscript; FL, EH, AP,  
34 KS, IU, PS and LAD critically reviewed the manuscript; FL, EH, AP, KS, IU, PS and  
35 LAD and prepared the manuscript for submission; LAD is the guarantor of the study.  
36  
37  
38  
39  
40  
41  
42  
43  
44  
45  
46  
47  
48  
49  
50  
51  
52  
53  
54  
55  
56  
57  
58  
59  
60

## INTRODUCTION

Human Papillomavirus (HPV) vaccines are subunit vaccines containing virus-like particles (VLPs), and typically require multiple doses to confer a sufficient immune response,[1] therefore, a three-dose schedule (0, 2, 6 months) was initially approved by the European Medicines Agency (EMA). As the immune response has been shown to be stronger in young girls 9-14 years of age compared to women 15-25 years of age, recommendations to reduce the number of doses to two have been put forward for the younger age groups, provided doses are optimally spaced.[2-6] Thus, in 2014, HPV vaccines were licensed in a two-dose schedule for girls aged between 9-14 years of age with doses at 0 and 6 months.[7, 8]

In Sweden, HPV vaccination was originally introduced as part of a subsidised three-dose schedule in 2007 for girls and women aged 13-17 years. Other ages could still be vaccinated, but were required to pay the full cost of the vaccine. In 2012, an organised national programme was initiated, with girls aged 10-12 routinely vaccinated as part of the childhood vaccination programme. Catch-up vaccinations were offered to girls aged 13-18 years. In January 2015, a two-dose schedule for girls aged 10-13 was implemented.

Several potential benefits may be conferred by such a reduced dosing schedule; including increased compliance, lower programme costs and improved logistics. However, the recommendation for a two-dose schedule was based on immunogenicity results and does not take into account the antibody threshold at which HPV diseases may be prevented – a threshold that has yet to be identified.[9] Therefore,

1  
2  
3 observational studies are necessary to ascertain effects of dose alterations in HPV  
4 vaccination on clinical endpoints. The use of condyloma as a marker for vaccine  
5 effectiveness is in this context timely, due to its considerably shorter latency period  
6 than precancerous cervical lesions and cancer. We here investigate whether optimal  
7 timing of two doses of qHPV vaccine could confer the same level of protection  
8 against condyloma as a standard three dose-schedule on a population level in Sweden.  
9  
10  
11  
12  
13  
14  
15  
16  
17

## 18 **METHODS**

### 19 **Study population**

20  
21  
22  
23  
24 This study was a nationwide open cohort of girls and young women aged 10-27 and  
25 registered as living in Sweden between 1<sup>st</sup> January 2006 and 31<sup>st</sup> December 2012.  
26  
27  
28  
29  
30  
31  
32  
33  
34  
35  
36  
37  
38  
39  
40  
41  
42  
43  
44  
45  
46  
47  
48  
49  
50  
51  
52  
53  
54  
55  
56  
57  
58  
59  
60  
Subjects entered the study cohort on the date of administration of the second dose of  
qHPV vaccine and were followed up for first occurrence of condyloma. The cohort of  
girls was sampled prior to the implementation of the two-dose schedule in Sweden i.e.  
girls and women were sampled during a three-dose schedule period.

To ensure only incident condyloma infection was measured, all individuals with  
condyloma diagnosis prior to follow up were excluded, as were individuals who  
emigrated or received bivalent HPV vaccine before follow up. Women that initiated  
qHPV vaccination over the age of 20 or turned 27 years of age before start of follow-  
up were also excluded (Figure 1). Women were censored during follow up if they  
died (n=58), received a condyloma diagnosis (n=619), emigrated (n=1037), were not  
resident in Sweden (N=4) or received the bivalent HPV vaccine (N=38).

### Data sources

Data were collected using the Swedish national population registers and linked through use of unique personal identification numbers.[10] The Swedish HPV Vaccination Register (SVEVAC), a voluntary national HPV vaccination register initiated in 2006, was used for information on HPV vaccination exposure. Timing between doses was calculated using data from this register. In addition to SVEVAC, data was also collected from the Prescribed Drug Register (PDR), which contains information on all prescriptions handled at Swedish pharmacies since July 2005. The Patient Register and PDR were used to extract information on condyloma outcomes. The Patient Register contains data regarding all inpatient and outpatient visits in Swedish hospitals and specialist care since 1987 and 2001, respectively. Information regarding deaths was collected from the Cause of Death Register and emigration status was collected from the Migration Register.

### Case definition

Condyloma cases were defined as a first diagnosis of condyloma in the Patient Register or a prescription for condyloma specific treatments in the PDR. In the Patient Register, all women that received a main or secondary diagnosis of condyloma were identified using the ICD10 code A63.0.[11] In the PDR, all women who received podophyllotoxin and imiquimod were identified using Anatomical Therapeutical Chemical Codes (ATC) D06BB04 and D06BB10 respectively.[12]

### Vaccination status



1  
2  
3 SVEVAC was used to obtain bivalent and quadrivalent HPV vaccination dates and  
4  
5 was complemented with prescription data collected from the PDR, using ATC codes  
6  
7 J07BM01 and J07BM02, respectively.  
8  
9

### 10 11 **Statistical analysis**

12  
13  
14 Crude incidence rates (IRs) per 100 000 person-years were calculated as the number  
15  
16 of cases of condyloma per accrued person-time, stratified by the time interval between  
17  
18 first and second dose (0-3, 4-7, or 8+ months). As we have previously shown an effect  
19  
20 of age at vaccination on vaccine effectiveness,[12, 13] girls and women were grouped  
21  
22 into two age-at-first-vaccination categories (10-16 and 17-19 years), a divide  
23  
24 reflecting the median age for sexual debut in Sweden at 16.5 years.[14]  
25  
26  
27  
28

29  
30 Poisson regression was used to model IRs by time between first and second dose and  
31  
32 age at first vaccination and adjusted for attained age. The time scale for individual  
33  
34 follow-up was attained age, which was split into five intervals (10-13, 14-16, 17-19,  
35  
36 20-21 and 22+ years), to reflect increasing risk of infection and disease with  
37  
38 increasing age. Vaccine dosage (three versus two doses) was handled as a time-  
39  
40 varying exposure, so that women could contribute person-time to both dose  
41  
42 categories. The effect of time between doses was allowed to vary by age at first  
43  
44 vaccination via an interaction term. This model was then used to estimate incidence  
45  
46 rate ratios (IRRs) and 95% confidence intervals (CIs) after two doses of qHPV  
47  
48 relative to three sets of references groups: first, compared to women who had initiated  
49  
50 vaccination at the same age and had received three doses of qHPV (0, 2 and 6  
51  
52 months); these IRRs measure effectiveness of a two-dose schedule with different  
53  
54 timings between dose one and two relative to a standard three-dose schedule. Second,  
55  
56  
57  
58  
59  
60

1  
2  
3 compared to women who had initiated vaccination at the same age and had received  
4 three doses of qHPV with the same timing between first and second dose (two doses  
5 with 0-3 months vs three doses with 0-3 months etc.); this matched comparison  
6 addresses the question of how much extra protection is gained on average by a third  
7 dose for different timings for the first two. Third, compared to women who had  
8 initiated vaccination at the same age and had received three doses of qHPV with no  
9 restriction on the time between dose one and two or dose two and three; these IRRs  
10 measure effectiveness of a two dose schedule relative to a pragmatic three-dose  
11 schedule. IRs and IR differences (IRDs) with corresponding 95% CIs predicted by the  
12 models and averaged across levels of attained age in the study cohort were also  
13 reported. Furthermore, a sensitivity analysis was conducted restricting the time  
14 between dose one and two to 12 months, but as the IRRs were comparable, this cut  
15 off was not applied (data not shown).  
16  
17  
18  
19  
20  
21  
22  
23  
24  
25  
26  
27  
28  
29  
30  
31  
32  
33

34 **Ethical Approval:** Ethical approval for this study was granted by the Regional  
35 Ethical Review Board of Stockholm, Sweden, which determined that informed  
36 consent from the study participants was not required.  
37  
38  
39  
40  
41  
42

## 43 RESULTS

### 44 Study cohort

45  
46  
47 264 498 girls under the age of 20 were vaccinated with at least two doses of qHPV at  
48 the end of the study period. Of these, 79 042 (29.9%) received only two doses of  
49 qHPV vaccine and 185 456 (70.1%) received all three doses. The majority  
50 (n=154 440, 83.3%) of the individuals fully vaccinated followed the recommended  
51  
52  
53  
54  
55  
56  
57  
58  
59  
60

1  
2  
3 dosing schedule given at 0, 2, and 6 months. Mean time in follow-up was 682 days  
4  
5 (range 1-2250 days).  
6  
7  
8

### 9 10 **Crude incidence rates**

11 For girls initiating vaccination with qHPV before 17 years the IR after vaccination  
12  
13 with two doses was 84 (95% CI 66 to 108), 95 (95% CI 48 to 190), and 351 (95% CI  
14  
15 168 to 737) per 100 000 person-years, when there were 0-3, 4-7 and 8+ months  
16  
17 between dose one and two, respectively (Table 1).  
18  
19  
20  
21  
22  
23  
24  
25  
26  
27  
28  
29  
30  
31  
32  
33  
34  
35  
36  
37  
38  
39  
40  
41  
42  
43  
44  
45  
46  
47  
48  
49  
50  
51  
52  
53  
54  
55  
56  
57  
58  
59  
60

Table 1. Number of individuals, cases, person-years, and crude IR by age at vaccination initiation and time between dose 1 and 2

| Age at first vaccination | Number of doses                    | Time between dose 1 and 2 (months) | Individuals (n) | Condyloma cases (n) | Person-years | Crude IR, (95%CI)* |
|--------------------------|------------------------------------|------------------------------------|-----------------|---------------------|--------------|--------------------|
| ≤16yr                    | 2 doses                            | 0-3                                | 204103          | 63                  | 74611        | 84 (66;108)        |
|                          |                                    | 4-7                                | 8095            | 8                   | 8404         | 95 (48;190)        |
|                          |                                    | 8+                                 | 1894            | 7                   | 1992         | 351 (168;737)      |
|                          | 3 doses                            | 0-3                                | 142046          | 222                 | 275495       | 81 (71;92)         |
|                          |                                    | 4-7                                | 2803            | 8                   | 6619         | 121 (60;242)       |
|                          |                                    | 8+                                 | 919             | 2                   | 1646         | 121 (30;486)       |
|                          | Standard dosing schedule (0, 2, 6) | 122425                             | 182             | 231393              | 79 (68;91)   |                    |
| 17-19yr                  | 2 doses                            | 0-3                                | 46712           | 97                  | 23750        | 408 (335;498)      |
|                          |                                    | 4-7                                | 2965            | 6                   | 3886         | 154 (69;344)       |

Lamb 12

|         |                                    |       |     |       |                |
|---------|------------------------------------|-------|-----|-------|----------------|
|         | 8+                                 | 615   | 6   | 995   | 603 (271;1343) |
| 3 doses | 0-3                                | 38705 | 197 | 93908 | 210 (182;241)  |
|         | 4-7                                | 808   | 3   | 2087  | 144 (46;446)   |
|         | 8+                                 | 175   | 0   | 365   | -              |
|         | Standard dosing schedule (0, 2, 6) | 32015 | 146 | 76168 | 192 (163;225)  |

---

\* IR reported per 100 000 person-years

1  
2  
3  
4  
5  
6  
7  
8  
9  
10  
11  
12  
13  
14  
15  
16  
17  
18  
19  
20  
21  
22  
23  
24  
25  
26  
27  
28  
29  
30  
31  
32  
33  
34  
35  
36  
37  
38  
39  
40  
41  
42  
43  
44  
45  
46  
47  
48  
49  
50  
51  
52  
53  
54  
55  
56  
57  
58  
59  
60

Condyloma incidence after two-dose vaccination was higher in girls initiating vaccination after 17 years of age, with IRs of 408 (95% CI 335 to 498), 154 (95% CI 69 to 344), and 603 (95% CI 271 to 1343) per 100 000, when there were 0-3 months, 4-7 months and 8+ months between dose one and two, respectively (Table 1).

### **Incidence rate ratios comparing two doses versus standard three-dose vaccination**

For girls initiating vaccination before the age of 17 there was a statistically significantly increased risk for condyloma when comparing two-dose vaccination 0-3 months apart (IRR 1.96, 95% CI 1.44 to 2.68) and 8+ months apart (IRR 4.36, 95% CI 2.05 to 9.28) to a standard three-dose schedule. No statistically significant association (IRR=1.27, 95% CI 0.63 to 2.58) was found after vaccination with two doses given 4-7 months apart. The IRDs predicted by the model were 59 (95% CI 25 to 92), 16 (95% CI -38 to 71) and 204 (95%CI=8 to 402) extra cases per 100 000 person-years for 0-3 months, 4-7 months and 8+ months between doses one and two, respectively (Table 2).

Table 2. IR, IRR, and IRD comparing 2 versus 3 dose vaccination by age at vaccination initiation and time between dose 1 and 2, adjusted for attained age

| Age at first vaccination | Number of doses | Time between dose 1 and 2 (months) | IR, 95%CI*    | P-value | IRR, 95%CI       | P-value | IRD, 95%CI*   | P-value |
|--------------------------|-----------------|------------------------------------|---------------|---------|------------------|---------|---------------|---------|
| ≤16yr                    | 3 doses         | Standard dosing schedule (0, 2, 6) | 61 (52;70)    | <0.001  | Ref              | Ref     | Ref           | Ref     |
|                          | 2 doses         | 0-3                                | 119 (88;151)  | <0.001  | 1.96 (1.44;2.68) | <0.001  | 59 (25;92)    | 0.001   |
|                          |                 | 4-7                                | 77 (24;131)   | 0.005   | 1.27 (0.63;2.58) | 0.506   | 17 (-38;71)   | 0.551   |
|                          |                 | 8+                                 | 265 (68;462)  | 0.008   | 4.36 (2.05;9.28) | <0.001  | 205 (8;402)   | 0.042   |
| 17-19yr                  | 3 doses         | Standard dosing schedule (0, 2, 6) | 113 (90;135)  | <0.001  | Ref              | Ref     | Ref           | Ref     |
|                          | 2 doses         | 0-3                                | 239 (187;291) | <0.001  | 2.12 (1.62;2.77) | <0.001  | 126 (73;179)  | <0.001  |
|                          |                 | 4-7                                | 91 (18;165)   | 0.015   | 0.81 (0.36;1.84) | 0.615   | -21 (-97;54)  | 0.580   |
|                          |                 | 8+                                 | 355 (68;643)  | 0.015   | 3.16 (1.40;7.14) | 0.006   | 243 (-44;530) | 0.097   |

\*IR, IRD reported per 100 000 person-years. Reference groups: ≤16yr with 3 doses of qHPV (0,2,6 months) and 17-19yr with 3 doses of qHPV (0,2,6 months)

1  
2  
3 A similar pattern is seen in girls and women initiating vaccination after turning 17,  
4  
5 with increased risks for condyloma after two doses if given 0-3 months (IRR=2.12,  
6  
7 95%CI=1.62 to 2.77) or 8+ months (IRR=3.16 95%CI=1.40 to 7.14) apart was  
8  
9 observed. No association was found when comparing two versus three doses with 4-7  
10  
11 months between dose one and two (IRR=0.81, 95%CI=0.36 to 1.84) (Table 2).  
12  
13

### 14 15 16 **Incidence rate ratios comparing two dose versus matched three dose vaccination**

17  
18 Comparing two-dose vaccination, 0-3 months apart, versus three-dose vaccination  
19  
20 with 0-3 months between doses one and two, results remained effectively unchanged  
21  
22 both for girls initiating vaccination prior to age 17 (IRR=1.95, 95% CI=1.44 to 2.64)  
23  
24 and girls initiating vaccination between 17 and 19 years (IRR=1.88, 96%CI=1.46 to  
25  
26 2.42) (Table 3)  
27  
28  
29  
30  
31  
32  
33  
34  
35  
36  
37  
38  
39  
40  
41  
42  
43  
44  
45  
46  
47  
48  
49  
50  
51  
52  
53  
54  
55  
56  
57  
58  
59  
60



Table 3. IR, IRR, and IRD comparing two-dose vaccination with varying time between dose 1 and 2 versus three-dose vaccination by age at vaccination initiation, adjusted for attained age

| Age at first vaccination | Number of doses | Time between dose 1 and 2 (months) | IR, 95%CI*   | P-value | IRR, 95%CI        | P-value | IRD, 95%CI*   | P-value |
|--------------------------|-----------------|------------------------------------|--------------|---------|-------------------|---------|---------------|---------|
| ≤16yr                    | 3 doses         | 0-3                                | 63 (55;72)   | <0.001  | Ref               | Ref     | Ref           | Ref     |
|                          | 2 doses         | 0-3                                | 123 (90;156) | <0.001  | 1.95 (1.44;2.64)  | <0.001  | 60 (26;94)    | <0.001  |
| ≤16yr                    | 3 doses         | 4-7                                | 91 (28;154)  | 0.005   | Ref               | Ref     | Ref           | Ref     |
|                          | 2 doses         | 4-7                                | 79 (24;133)  | 0.005   | 0.87 (0.33;2.32)  | 0.779   | -12 (-95;71)  | 0.779   |
| ≤16yr                    | 3 doses         | 8+                                 | 86 (-33;205) | 0.158   | Ref               | Ref     | Ref           | Ref     |
|                          | 2 doses         | 8+                                 | 270 (70;470) | 0.008   | 3.14 (0.65;15.09) | 0.154   | 184 (-49;417) | 0.122   |

1  
2  
3  
4  
5  
6  
7  
8  
9  
10  
11  
12  
13  
14  
15  
16  
17  
18  
19  
20  
21  
22  
23  
24  
25  
26  
27  
28  
29  
30  
31  
32  
33  
34  
35  
36  
37  
38  
39  
40  
41  
42  
43  
44  
45  
46  
47  
48  
49

|         |         |     |               |        |                  |        |              |        |
|---------|---------|-----|---------------|--------|------------------|--------|--------------|--------|
| 17-19yr | 3 doses | 0-3 | 129 (107;150) | <0.001 | Ref              | Ref    | Ref          | Ref    |
|         | 2 doses | 0-3 | 242 (190;294) | <0.001 | 1.88 (1.46;2.42) | <0.001 | 114 (60;167) | <0.001 |
| 17-19yr | 3 doses | 4-7 | 88 (-12;189)  | 0.084  | Ref              | Ref    | Ref          | Ref    |
|         | 2 doses | 4-7 | 95 (19;172)   | 0.015  | 1.08 (0.27;4.31) | 0.916  | 7 (-119;133) | 0.915  |
| 17-19yr | 3 doses | 8+  | 0             | -      | Ref              | Ref    | Ref          | Ref    |
|         | 2 doses | 8+  | 373 (72;675)  | 0.015  | -                | -      | 373 (72;675) | 0.015  |

---

\* IR, IRD reported per 100 000 person-years. Matched reference groups: ≤16yr with 3 doses of qHPV with 0-3 months between dose 1 and 2, ≤16yr with 3 doses of qHPV with 4-7 months between dose 1 and 2 and ≤16yr with 3 doses of qHPV with 8+ months between dose 1 and 2; 17-19yr with 3 doses of qHPV with 0-3 months between dose 1 and 2, 17-19yr with 3 doses of qHPV with 4-7 months between dose 1 and 2 and 17-19yr with 3 doses of qHPV with 8+ months between dose 1 and 2.

1  
2  
3 Comparing two versus three-dose vaccination with 4-7 and 8+ months between the  
4 first two doses for both schedules, we found non-significant associations with IRRs of  
5 0.87 (95% CI=0.33 to 2.32) and 3.14 (95% CI=0.65 to 15.09) respectively, for girls  
6 initiating vaccination prior to 17, with corresponding IRDs of -12 (95% CI=-95 to 71)  
7 and 184 (95% CI=-49 to 417) cases per 100 000 person-years (Table 3). For girls  
8 initiating vaccination between 17 and 19 years, no association was found for 4-7  
9 months in between doses (IRR=1.08, 95%CI=0.27 to 4.31); no cases of condyloma  
10 were reported in fully vaccinated women initiating vaccination between 17 and 19  
11 years (Table 3).  
12  
13  
14  
15  
16  
17  
18  
19  
20  
21  
22  
23  
24

### 25 **Incidence rate ratios comparing two doses versus pragmatic three dose** 26 **vaccination**

27  
28  
29 Changing the reference group to pragmatic three-dose vaccination did not materially  
30 affect the results. (See supplementary table).  
31  
32  
33  
34  
35

## 36 **DISCUSSION**

### 37 38 39 **Statement of principle findings**

40  
41  
42 This population-based study investigates the incidence of condyloma after two doses  
43 of qHPV by time between first and second dose. Our results suggest that a two-dose  
44 regimen is similarly effective as a standard three-dose schedule if given 4-7 months  
45 apart. This is in line with the recommendations from the European Medicines Agency  
46 (EMA) and the World Health Organization Strategic Advisory Group of Experts  
47 (SAGE) and immunological results from clinical trials.[2, 3, 5, 6, 15-19]  
48  
49  
50  
51  
52  
53  
54  
55  
56  
57  
58  
59  
60

### **In relation to other studies**

The impact of HPV vaccines was first recognised for HPV infections, and HPV-related diseases with short incubation times following infection such as genital warts.[20] Studies have shown that three-dose schedules of qHPV vaccination have been effective in the prevention of genital warts at a population level.[21-24] In addition, observational studies assessing the effectiveness of qHPV against cervical abnormalities have been carried out.[25-28] A recent review by Garland et al. suggested that in successive birth cohorts that are beginning screening, there have been reductions in the number of low-grade cytological abnormalities and high-grade histology confirmed cervical lesions (approximately 45% and 85% respectively).[29]

Alternative dosing schedules on condyloma incidence have been investigated in Denmark and Sweden,[9, 13] with both studies showing that condyloma incidence was statistically significantly higher in women aged 19-24 years after two doses rather than three. However, receipt of two vaccine doses with optimum interval was reported as non-inferior to three doses in terms of condyloma reduction, a finding with which the present study concurs.

### **Strengths and weaknesses**

This was a nationwide study including the entire vaccinated Swedish female population aged 10-27 years. The use of high quality national register-based data meant that we were able to link vaccination status to disease outcome on an individual level.

1  
2  
3 A limitation of our study is that a small proportion of patients will neither seek  
4 hospital care for condyloma nor receive prescription for treatment, and thus will not  
5 be included in the registers. This would result in an underestimation of the number of  
6 condyloma cases. We expect however, that this underestimation in the registers for  
7 the true number of condyloma cases [12] would be either non-differential with  
8 regards to vaccination exposure, or conservative in impact, based on the apparent  
9 health-seeking behavior of women who are vaccinated.[13]  
10  
11  
12  
13  
14  
15  
16  
17  
18  
19

20  
21 It is also possible that individuals might have a prevalent HPV infection at time of  
22 vaccination, resulting in an underestimation of protective effect of the vaccine. We  
23 have attempted to control for this by excluding women who had a history of  
24 condyloma before the start of individual follow-up. Additionally, given that we start  
25 follow-up for condyloma incidence only after the second dose, we have the automatic  
26 benefit of a buffer period as used in.[13]  
27  
28  
29  
30  
31  
32  
33  
34  
35

36 It is also of note that, the majority of women in the cohort had 0-3 months between  
37 first and second dose, which limited the power for other exposure groups in our study  
38 and resulted in wider confidence intervals, particularly in comparisons with the older  
39 age group and increasing time between doses.  
40  
41  
42  
43  
44  
45  
46

### 47 **Implications**

48  
49 Reducing the number of HPV vaccine doses from three to two could potentially lead  
50 to a number of positive effects, including lower costs, increased compliance and  
51 improved logistics of the vaccination programme. It is however key to remain vigilant  
52 with regards to follow-up of disease outcomes and supplement clinical trial data and  
53  
54  
55  
56  
57  
58  
59  
60

1  
2  
3 policy recommendations with real-life evidence, such as those presented here. The  
4  
5 findings imply that the current recommendation of two dose-schedules is appropriate,  
6  
7 but we reinforce the significance of optimal timing between doses.  
8  
9

### 10 11 12 **Unanswered questions and future research**

13  
14 We did not consider HPV-related disease outcomes other than condyloma. More  
15  
16 studies with longer follow-up time are needed to ascertain the effectiveness of a two-  
17  
18 dose schedule for HPV-related disease outcomes such as cervical intraepithelial  
19  
20 neoplasia or cervical cancer. As more countries implement two-dose schedules, the  
21  
22 impact on transmission dynamics and herd immunity will also become clearer.[22] It  
23  
24 should also be taken into account that the duration of protection for both the two-dose  
25  
26 and three-dose schedule is not yet known and more time and data are required before  
27  
28 conclusions can be drawn regarding the long-term effectiveness of these schedules,  
29  
30 and a reduced-dose schedule can be recommended for girls older than 15.[2, 30]  
31  
32  
33  
34  
35

### 36 37 **Conclusion**

38  
39 For prevention of condyloma, a two-dose schedule of qHPV vaccine with 4-7 months  
40  
41 between first and second dose may be as effective as standard three-dose vaccination,  
42  
43 for women first vaccinated before the age of 20. The results from this nationwide  
44  
45 observational study support immunogenicity findings from clinical trials.  
46  
47  
48  
49  
50  
51  
52  
53  
54  
55  
56  
57  
58  
59  
60

## REFERENCES

1. Schiller, J.T. and D.R. Lowy, *Raising Expectations For Subunit Vaccine*. J Infect Dis, 2014.
2. Dobson, S.R., et al., *Immunogenicity of 2 doses of HPV vaccine in younger adolescents vs 3 doses in young women: a randomized clinical trial*. JAMA, 2013. **309**(17): p. 1793-802.
3. Lazcano-Ponce, E., et al., *Overcoming barriers to HPV vaccination: non-inferiority of antibody response to human papillomavirus 16/18 vaccine in adolescents vaccinated with a two-dose vs. a three-dose schedule at 21 months*. Vaccine, 2014. **32**(6): p. 725-32.
4. Neuzil, K.M., et al., *Immunogenicity and reactogenicity of alternative schedules of HPV vaccine in Vietnam: a cluster randomized noninferiority trial*. JAMA, 2011. **305**(14): p. 1424-31.
5. Romanowski, B., et al., *Immune response to the HPV-16/18 AS04-adjuvanted vaccine administered as a 2-dose or 3-dose schedule up to 4 years after vaccination: results from a randomized study*. Hum Vaccin Immunother, 2014. **10**(5): p. 1155-65.
6. Romanowski, B., et al., *Immunogenicity and safety of the HPV-16/18 AS04-adjuvanted vaccine administered as a 2-dose schedule compared with the licensed 3-dose schedule: results from a randomized study*. Hum Vaccin, 2011. **7**(12): p. 1374-86.
7. WHO. *Human papillomavirus vaccines: WHO position paper, October 2014*. Available from: <http://www.who.int/wer/2014/wer8943.pdf?ua=1>.
8. European Medicines Agency, *Assessment report Gardasil 2014*.
9. Blomberg, M., et al., *Dose-Related Differences in Effectiveness of Human Papillomavirus Vaccination Against Genital Warts: A Nationwide Study of 550 000 Young Girls*. Clin Infect Dis, 2015.
10. Ludvigsson, J.F., et al., *The Swedish personal identity number: possibilities and pitfalls in healthcare and medical research*. Eur J Epidemiol, 2009. **24**(11): p. 659-67.
11. World Health Organisation. *International Classification of Disease, Tenth Revision*. 2010.
12. Leval, A., et al., *Quadrivalent human papillomavirus vaccine effectiveness: a Swedish national cohort study*. J Natl Cancer Inst, 2013. **105**(7): p. 469-74.
13. Herweijer, E., et al., *Association of varying number of doses of quadrivalent human papillomavirus vaccine with incidence of condyloma*. JAMA, 2014. **311**(6): p. 597-603.
14. Jensen, K.E., et al., *Women's sexual behavior. Population-based study among 65,000 women from four Nordic countries before introduction of human papillomavirus vaccination*. Acta Obstet Gynecol Scand, 2011. **90**(5): p. 459-67.
15. Donken, R., et al., *Inconclusive evidence for non-inferior immunogenicity of two- compared with three-dose HPV immunization schedules in preadolescent girls: A systematic review and meta-analysis*. J Infect, 2015. **71**(1): p. 61-73.
16. Hernandez-Avila, M., et al., *Evaluation of the immunogenicity of the quadrivalent HPV vaccine using 2 versus 3 doses at month 21: An*

- 1  
2  
3 *epidemiological surveillance mechanism for alternate vaccination schemes.*  
4 Hum Vaccin Immunother, 2016. **12**(1): p. 30-8.
- 5 17. Kraiden, M., et al., *Assessment of HPV 16 and HPV 18 antibody responses by*  
6 *pseudovirus neutralization, Merck cLIA and Merck total IgG LIA*  
7 *immunoassays in a reduced dosage quadrivalent HPV vaccine trial.* Vaccine,  
8 2014. **32**(5): p. 624-30.
- 9  
10 18. Romanowski, B., et al., *Sustained immunogenicity of the HPV-16/18 AS04-*  
11 *adjuvanted vaccine administered as a two-dose schedule in adolescent girls:*  
12 *Five-year clinical data and modeling predictions from a randomized study.*  
13 Hum Vaccin Immunother, 2016. **12**(1): p. 20-9.
- 14 19. Safaeian, M., et al., *Durable antibody responses following one dose of the*  
15 *bivalent human papillomavirus L1 virus-like particle vaccine in the Costa*  
16 *Rica Vaccine Trial.* Cancer Prev Res (Phila), 2013. **6**(11): p. 1242-50.
- 17 20. Mariani, L., et al., *Early direct and indirect impact of quadrivalent HPV*  
18 *(4HPV) vaccine on genital warts: a systematic review.* Adv Ther, 2015.  
19 **32**(1): p. 10-30.
- 20  
21 21. Bogaards, J.A. and J. Berkhof, *Assessment of herd immunity from human*  
22 *papillomavirus vaccination.* Lancet Infect Dis, 2011. **11**(12): p. 896; author  
23 reply 896-7.
- 24 22. Donken, R., et al., *An exploration of individual- and population-level impact*  
25 *of the 2-dose HPV vaccination schedule in pre-adolescent girls.* Hum Vaccin  
26 Immunother, 2016. **12**(6): p. 1381-93.
- 27  
28 23. Donovan, B., et al., *Quadrivalent human papillomavirus vaccination and*  
29 *trends in genital warts in Australia: analysis of national sentinel*  
30 *surveillance data.* Lancet Infect Dis, 2011. **11**(1): p. 39-44.
- 31 24. Smith, M.A., et al., *Fall in genital warts diagnoses in the general and*  
32 *indigenous Australian population following implementation of a national*  
33 *human papillomavirus vaccination program: analysis of routinely collected*  
34 *national hospital data.* J Infect Dis, 2015. **211**(1): p. 91-9.
- 35 25. Crowe, E., et al., *Effectiveness of quadrivalent human papillomavirus*  
36 *vaccine for the prevention of cervical abnormalities: case-control study*  
37 *nested within a population based screening programme in Australia.* BMJ,  
38 2014. **348**: p. g1458.
- 39  
40 26. Gertig, D.M., et al., *Impact of a population-based HPV vaccination program*  
41 *on cervical abnormalities: a data linkage study.* BMC Med, 2013. **11**: p. 227.
- 42 27. Herweijer, E., et al., *Quadrivalent HPV vaccine effectiveness against high-*  
43 *grade cervical lesions by age at vaccination: A population-based study.* Int J  
44 Cancer, 2016. **138**(12): p. 2867-74.
- 45 28. Svahn, M.F., et al., *Burden and incidence of human papillomavirus-*  
46 *associated cancers and precancerous lesions in Denmark.* Scand J Public  
47 Health, 2016. **44**(6): p. 551-9.
- 48 29. Garland, S.M., et al., *Impact and Effectiveness of the Quadrivalent Human*  
49 *Papillomavirus Vaccine: A Systematic Review of 10 Years of Real-world*  
50 *Experience.* Clin Infect Dis, 2016. **63**(4): p. 519-27.
- 51 30. Jit, M., et al., *Comparison of two dose and three dose human papillomavirus*  
52 *vaccine schedules: cost effectiveness analysis based on transmission model.*  
53 BMJ, 2015. **350**: p. g7584.  
54  
55  
56  
57  
58  
59  
60



1  
2  
3 Figure 1. Details on study exclusions and the population analysed to investigate  
4 timing of two versus three doses of quadrivalent HPV vaccine and associated  
5 effectiveness against condyloma.  
6  
7  
8  
9  
10  
11  
12  
13  
14  
15  
16  
17  
18  
19  
20  
21  
22  
23  
24  
25  
26  
27  
28  
29  
30  
31  
32  
33  
34  
35  
36  
37  
38  
39  
40  
41  
42  
43  
44  
45  
46  
47  
48  
49  
50  
51  
52  
53  
54  
55  
56  
57  
58  
59  
60

1  
2  
3  
4  
5  
6  
7  
8  
9  
10  
11  
12  
13  
14  
15  
16  
17  
18  
19  
20  
21  
22  
23  
24  
25  
26  
27  
28  
29  
30  
31  
32  
33  
34  
35  
36  
37  
38  
39  
40  
41  
42  
43  
44  
45  
46  
47  
48  
49  
50  
51  
52  
53  
54  
55  
56  
57  
58  
59  
60

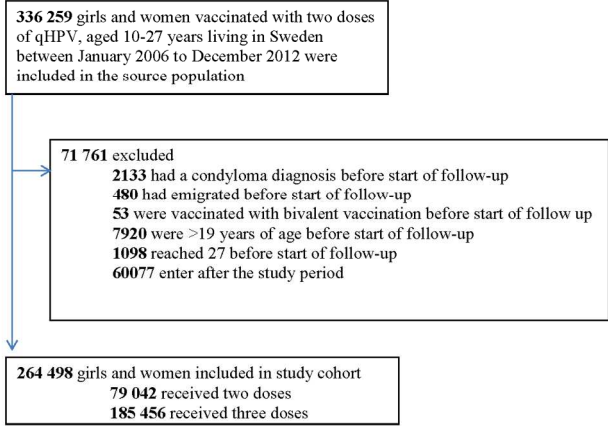

210x297mm (300 x 300 DPI)

Supplementary Table. IR, IRR, and IRD comparing 2 versus 3 dose vaccination by age at vaccination initiation and time between dose 1 and 2.

| Age at first vaccination | Number of doses | Time between dose 1 and 2 (months) | IR, 95% CI*   | P-value | IRR, 95% CI      | P-value   | IRD, 95% CI*  | P-value   |
|--------------------------|-----------------|------------------------------------|---------------|---------|------------------|-----------|---------------|-----------|
| ≤16yr                    | 3 doses         | Overall (0-3;4-7;8+)               | 64 (55;72)    | <0.001  | Reference        | Reference | Reference     | Reference |
|                          | 2 doses         | 0-3                                | 123 (90;156)  | <0.001  | 1.92 (1.42;2.60) | <0.001    | 59 (25;93)    | 0.001     |
|                          |                 | 4-7                                | 79 (24;133)   | 0.005   | 1.23 (0.61;2.49) | 0.562     | 15 (-40;70)   | 0.598     |
|                          |                 | 8+                                 | 270 (70;470)  | 0.008   | 4.22 (1.99;8.94) | <0.001    | 206 (6;406)   | 0.044     |
| 17-19yr                  | 3 doses         | Overall (0-3;4-7;8+)               | 127 (106;149) | <0.001  | Reference        | Reference | Reference     | Reference |
|                          | 2 doses         | 0-3                                | 242 (190;294) | <0.001  | 1.9 (1.48;2.45)  | <0.001    | 115 (62;168)  | <0.001    |
|                          |                 | 4-7                                | 95 (19;172)   | 0.015   | 0.75 (0.33;1.69) | 0.484     | -32 (-110;46) | 0.422     |
|                          |                 | 8+                                 | 374 (72;675)  | 0.015   | 2.93 (1.3;6.61)  | 0.009     | 246 (-54;547) | 0.108     |

\* IR, IRD reported per 100 000 person-years, reference groups: ≤16yr with 3 doses of qHPV (no time restriction between dose 1 and 1 and dose 2 and 3) and 17-19yrs with 3 doses of qHPV (no time restriction between dose 1 and 1 and dose 2 and 3).

STROBE 2007 (v4) Statement—Checklist of items that should be included in reports of cohort studies

| Section/Topic             | Item # | Recommendation                                                                                                                                                                       | Reported on page # |
|---------------------------|--------|--------------------------------------------------------------------------------------------------------------------------------------------------------------------------------------|--------------------|
| Title and abstract        | 1      | (a) Indicate the study’s design with a commonly used term in the title or the abstract                                                                                               | 1, 2               |
|                           |        | (b) Provide in the abstract an informative and balanced summary of what was done and what was found                                                                                  | 2                  |
| <b>Introduction</b>       |        |                                                                                                                                                                                      |                    |
| Background/rationale      | 2      | Explain the scientific background and rationale for the investigation being reported                                                                                                 | 5, 6               |
| Objectives                | 3      | State specific objectives, including any prespecified hypotheses                                                                                                                     | 6                  |
| <b>Methods</b>            |        |                                                                                                                                                                                      |                    |
| Study design              | 4      | Present key elements of study design early in the paper                                                                                                                              | 6                  |
| Setting                   | 5      | Describe the setting, locations, and relevant dates, including periods of recruitment, exposure, follow-up, and data collection                                                      | 6, 7, 8            |
| Participants              | 6      | (a) Give the eligibility criteria, and the sources and methods of selection of participants. Describe methods of follow-up                                                           | 6, 7, 8            |
|                           |        | (b) For matched studies, give matching criteria and number of exposed and unexposed                                                                                                  | N/A                |
| Variables                 | 7      | Clearly define all outcomes, exposures, predictors, potential confounders, and effect modifiers. Give diagnostic criteria, if applicable                                             | 6, 7, 8            |
| Data sources/ measurement | 8*     | For each variable of interest, give sources of data and details of methods of assessment (measurement). Describe comparability of assessment methods if there is more than one group | 7                  |
| Bias                      | 9      | Describe any efforts to address potential sources of bias                                                                                                                            | 6,                 |
| Study size                | 10     | Explain how the study size was arrived at                                                                                                                                            | 6,                 |
| Quantitative variables    | 11     | Explain how quantitative variables were handled in the analyses. If applicable, describe which groupings were chosen and why                                                         | 8, 9               |
| Statistical methods       | 12     | (a) Describe all statistical methods, including those used to control for confounding                                                                                                | 8, 9               |
|                           |        | (b) Describe any methods used to examine subgroups and interactions                                                                                                                  | 8, 9               |
|                           |        | (c) Explain how missing data were addressed                                                                                                                                          | N/A                |
|                           |        | (d) If applicable, explain how loss to follow-up was addressed                                                                                                                       | N/A                |
|                           |        | (e) Describe any sensitivity analyses                                                                                                                                                | 9                  |
| <b>Results</b>            |        |                                                                                                                                                                                      |                    |

|                          |     |                                                                                                                                                                                                              |            |
|--------------------------|-----|--------------------------------------------------------------------------------------------------------------------------------------------------------------------------------------------------------------|------------|
| Participants             | 13* | (a) Report numbers of individuals at each stage of study—eg numbers potentially eligible, examined for eligibility, confirmed eligible, included in the study, completing follow-up, and analysed            | 6, 9       |
|                          |     | (b) Give reasons for non-participation at each stage                                                                                                                                                         | 6          |
|                          |     | (c) Consider use of a flow diagram                                                                                                                                                                           | 6          |
| Descriptive data         | 14* | (a) Give characteristics of study participants (eg demographic, clinical, social) and information on exposures and potential confounders                                                                     |            |
|                          |     | (b) Indicate number of participants with missing data for each variable of interest                                                                                                                          | N/A        |
|                          |     | (c) Summarise follow-up time (eg, average and total amount)                                                                                                                                                  | 9, 10      |
| Outcome data             | 15* | Report numbers of outcome events or summary measures over time                                                                                                                                               | 9, 10      |
| Main results             | 16  | (a) Give unadjusted estimates and, if applicable, confounder-adjusted estimates and their precision (eg, 95% confidence interval). Make clear which confounders were adjusted for and why they were included | 10-18      |
|                          |     | (b) Report category boundaries when continuous variables were categorized                                                                                                                                    | N/A        |
|                          |     | (c) If relevant, consider translating estimates of relative risk into absolute risk for a meaningful time period                                                                                             | N/A        |
| Other analyses           | 17  | Report other analyses done—eg analyses of subgroups and interactions, and sensitivity analyses                                                                                                               | 18         |
| <b>Discussion</b>        |     |                                                                                                                                                                                                              |            |
| Key results              | 18  | Summarise key results with reference to study objectives                                                                                                                                                     | 18         |
| <b>Limitations</b>       |     |                                                                                                                                                                                                              |            |
| Interpretation           | 20  | Give a cautious overall interpretation of results considering objectives, limitations, multiplicity of analyses, results from similar studies, and other relevant evidence                                   | 19, 20, 21 |
| Generalisability         | 21  | Discuss the generalisability (external validity) of the study results                                                                                                                                        | 20, 21     |
| <b>Other information</b> |     |                                                                                                                                                                                                              |            |
| Funding                  | 22  | Give the source of funding and the role of the funders for the present study and, if applicable, for the original study on which the present article is based                                                | 3          |

\*Give information separately for cases and controls in case-control studies and, if applicable, for exposed and unexposed groups in cohort and cross-sectional studies.

**Note:** An Explanation and Elaboration article discusses each checklist item and gives methodological background and published examples of transparent reporting. The STROBE checklist is best used in conjunction with this article (freely available on the Web sites of PLoS Medicine at <http://www.plosmedicine.org/>, Annals of Internal Medicine at <http://www.annals.org/>, and Epidemiology at <http://www.epidem.com/>). Information on the STROBE Initiative is available at [www.strobe-statement.org](http://www.strobe-statement.org).

# BMJ Open

## TIMING OF TWO VERSUS THREE DOSES OF QUADRIVALENT HPV VACCINE AND ASSOCIATED EFFECTIVENESS AGAINST CONDYLOMA IN SWEDEN: A NATIONWIDE COHORT STUDY.

|                                 |                                                                                                                                                                                                                                                                                                                                                                                                                                                                                                                                                    |
|---------------------------------|----------------------------------------------------------------------------------------------------------------------------------------------------------------------------------------------------------------------------------------------------------------------------------------------------------------------------------------------------------------------------------------------------------------------------------------------------------------------------------------------------------------------------------------------------|
| Journal:                        | <i>BMJ Open</i>                                                                                                                                                                                                                                                                                                                                                                                                                                                                                                                                    |
| Manuscript ID                   | bmjopen-2016-015021.R1                                                                                                                                                                                                                                                                                                                                                                                                                                                                                                                             |
| Article Type:                   | Research                                                                                                                                                                                                                                                                                                                                                                                                                                                                                                                                           |
| Date Submitted by the Author:   | 03-Feb-2017                                                                                                                                                                                                                                                                                                                                                                                                                                                                                                                                        |
| Complete List of Authors:       | Lamb, Favelle; Karolinska Institutet, Medical Epidemiology and Biostatistics<br>Herweijer, Eva; Karolinska Institutet, Medical Epidemiology and Biostatistics<br>Ploner, Alexander; Karolinska Institutet, Medical Epidemiology and Biostatistics<br>Uhnöo, Ingrid; Folkhälsomyndigheten<br>Sundström, Karin; Karolinska Institutet, Medical Epidemiology and Biostatistics<br>Sparén, Pär; Karolinska Institutet, Medical Epidemiology and Biostatistics<br>Arnhem-Dahlström, Lisen; Karolinska institute, Medical Epidemiology and Biostatistics |
| <b>Primary Subject Heading</b>: | Epidemiology                                                                                                                                                                                                                                                                                                                                                                                                                                                                                                                                       |
| Secondary Subject Heading:      | Public health, Infectious diseases                                                                                                                                                                                                                                                                                                                                                                                                                                                                                                                 |
| Keywords:                       | INFECTIOUS DISEASES, EPIDEMIOLOGY, PREVENTIVE MEDICINE, PUBLIC HEALTH                                                                                                                                                                                                                                                                                                                                                                                                                                                                              |
|                                 |                                                                                                                                                                                                                                                                                                                                                                                                                                                                                                                                                    |

SCHOLARONE™  
Manuscripts

1  
2  
3 **TIMING OF TWO VERSUS THREE DOSES OF QUADRIVALENT HPV**  
4 **VACCINE AND ASSOCIATED EFFECTIVENESS AGAINST CONDYLOMA**  
5 **IN SWEDEN: A NATIONWIDE COHORT STUDY.**  
6  
7  
8

9 Lamb F<sup>1</sup>, Herweijer E<sup>1</sup>, Ploner A<sup>2</sup>, Uhnöo I<sup>3</sup>, Sundström K<sup>4</sup>, Sparén P<sup>5\*</sup>, Arnheim-  
10 Dahlström L<sup>6</sup>  
11  
12

13  
14  
15  
16 <sup>1</sup> PhD Student, Karolinska Institutet, Department of Medical Epidemiology and  
17 Biostatistics, Nobels Väg 12A, SE-171 77 Stockholm, Sweden  
18

19  
20  
21 <sup>2</sup> Senior Biostatistician, Karolinska Institutet, Department of Medical Epidemiology  
22 and Biostatistics, Nobels Väg 12A, SE-171 77 Stockholm, Sweden  
23

24  
25 <sup>3</sup> Senior Expert, Associate Professor, Public Health Agency of Sweden, 171 82,  
26 Solna, Stockholm, Sweden  
27

28  
29 <sup>4</sup> PhD and MD, Karolinska Institutet, Department of Laboratory Medicine, Alfreds  
30 Nobels Allé 8, 141 83, Stockholm, Sweden  
31

32  
33 <sup>5</sup> Professor, Karolinska Institutet, Department of Medical Epidemiology and  
34 Biostatistics, Nobels Väg 12A, SE-171 77 Stockholm, Sweden  
35

36  
37 <sup>6</sup> Associate Professor, Karolinska Institutet, Department of Medical Epidemiology  
38 and Biostatistics, Nobels Väg 12A, SE-171 77 Stockholm, Sweden  
39  
40  
41

42  
43  
44  
45 \*Correspondence to: Department of Medical Epidemiology and Biostatistics, Nobels  
46 Väg 12A, SE-171 77 Stockholm, Sweden. Email: par.sparen@ki.se, phone: +46  
47 852486102  
48  
49

50  
51  
52 Word count text: 3110

53  
54 Word count abstract: 288  
55  
56  
57  
58  
59  
60

## ABSTRACT

### Objective

To assess incidence of condyloma after two doses of quadrivalent HPV (qHPV)-vaccine, by time since first vaccine dose, in girls and women initiating vaccination before age 20.

**Design:** Register-based nationwide open cohort study

**Setting:** Sweden

**Participants:** Girls and women initiating qHPV vaccination before age 20 between 2006 and 2012. The study cohort included 264 498 girls, of whom 72 042 had received two doses of qHPV vaccine and 185 456 had received all 3 doses.

**Main outcome measure:** Incidence rate ratios (IRRs) of condyloma estimated by time between first and second dose of qHPV in months (m) and age at vaccination, adjusted for attained age.

**Results:** For girls first vaccinated with two doses before the age of 17, the IRR of condyloma for 0-3m between first and second dose was 1.96 (95% CI 1.43 to 2.68) as compared to standard three-dose schedule. The IRRs were 1.27 (95% CI 0.63 to 2.58) and 4.36 (95% CI=2.05 to 9.28) after receipt of two doses with 4-7m and 8+m between doses, respectively. For women first vaccinated after the age of 17, vaccination with two doses of qHPV vaccine and 0-3m between doses was associated with an IRR of 2.12 (95% CI=1.62 to 2.77). For an interval of 4-7m between doses, the IRR did not statistically significantly differ to the standard three-dose schedule (IRR=0.81, 95% CI= 0.36 to 1.84). For women with 8+m between dose one and two the IRR was 3.16 (95% CI=1.40 to 7.14).

### Conclusion



1  
2  
3 A two-dose schedule for qHPV vaccine with 4-7 months between first and second  
4  
5 dose may be as effective against condyloma in girls and women initiating vaccination  
6  
7 under 20 years as a three-dose schedule. Results from this nationwide study support  
8  
9 immunogenicity data from clinical trials.  
10

### 11 12 13 14 **Strengths and limitations of this study**

- 15  
16  
17  
18 • We were able to link vaccination status to disease outcome on an individual  
19  
20 level through use of high quality national register-based data.
- 21  
22  
23 • Observation studies such as this, are able to look at the pragmatic  
24  
25 effectiveness of vaccination in a large population.
- 26  
27  
28 • We did not look at HPV disease outcomes other than condyloma.
- 29  
30  
31 • The majority of girls and women in the cohort had 0-3 months between first  
32  
33 and second dose, which limited the power for other exposure groups in our  
34  
35 study.
- 36  
37  
38 • A small proportion of condyloma cases may have been missed, as some  
39  
40 patients will neither seek hospital care for condyloma nor receive prescription  
41  
42 for treatment, and thus will not be included in the registers.  
43  
44

45  
46 **Funding:** This study was supported by the Swedish Foundation for Strategic research  
47  
48 grant number KF10-0046. The funder had no role in the design and conduct of the  
49  
50 study; collection, management, analysis, and interpretation of the data; preparation,  
51  
52 review, and approval of manuscript or decision to submit the manuscript for  
53  
54 publication.  
55  
56  
57  
58  
59  
60

1  
2  
3 **Competing interests:** All authors have completed the ICMJE uniform disclosure  
4 form at [www.icmje.org/coi\\_disclosure.pdf](http://www.icmje.org/coi_disclosure.pdf) and declare: no support from any  
5 organisation for the submitted work; LAD has received research grants to her  
6 institution for other studies from MSD Sanofi Pasteur, Merck Sharp and Dohme, and  
7 GlaxoSmithKline. KS has received grants from Merck Sharp and Dohme for other  
8 studies on HPV vaccination in Sweden; no other relationships or activities that could  
9 appear to have influenced the submitted work.  
10  
11  
12  
13  
14  
15  
16  
17  
18  
19

20  
21 **Data sharing:** The study utilises unique individual level Swedish register data,  
22 which cannot be shared in the public domain according to Swedish law. The  
23 individual-level data underlying the study will be available from the corresponding  
24 author upon request, given that appropriate ethical and legal requirements are met.  
25  
26  
27  
28  
29  
30  
31

32 **Contributors:** FL, EH, AP, KS, IU, PS and LAD contributed to the design of the  
33 study; FL, EH, AP and PS analysed the data; FL drafted the manuscript; FL, EH, AP,  
34 KS, IU, PS and LAD critically reviewed the manuscript; FL, EH, AP, KS, IU, PS and  
35 LAD and prepared the manuscript for submission; LAD is the guarantor of the study.  
36  
37  
38  
39  
40  
41  
42  
43  
44  
45  
46  
47  
48  
49  
50  
51  
52  
53  
54  
55  
56  
57  
58  
59  
60

## INTRODUCTION

Human Papillomavirus (HPV) vaccines are subunit vaccines containing virus-like particles (VLPs), and typically require multiple doses to confer an immune response,[1] therefore, a three-dose schedule (0, 2, 6 months) was initially approved by the European Medicines Agency (EMA). As the immune response has been shown to be stronger in young girls 9-14 years of age compared to women 15-25 years of age, recommendations to reduce the number of doses to two have been put forward for the younger age groups, provided doses are optimally spaced.[2-6] Thus, in 2014, HPV vaccines were licensed in a two-dose schedule for girls aged between 9-14 years of age with doses at 0 and 6 months.[7, 8]

In Sweden, HPV vaccination was originally introduced as part of a subsidised three-dose schedule in 2007 for girls and women aged 13-17 years. Other ages could still be vaccinated, but were required to pay the full cost of the vaccine. In 2012, an organised national programme was initiated, with girls aged 10-12 routinely vaccinated as part of the childhood vaccination programme. Catch-up vaccinations were offered to girls aged 13-18 years. In January 2015, a two-dose schedule for girls aged 10-13 was implemented.

Several potential benefits may be conferred by such a reduced dosing schedule; including increased compliance, lower programme costs and improved logistics. However, the recommendation for a two-dose schedule was based on immunogenicity results and does not take into account the antibody threshold at which HPV diseases may be prevented – a threshold that has yet to be identified.[9] Therefore,

1  
2  
3 observational studies are necessary to ascertain effects of dose alterations in HPV  
4 vaccination on clinical endpoints. The use of condyloma as a marker for vaccine  
5 effectiveness is in this context timely, due to its considerably shorter latency period  
6 than precancerous cervical lesions and cancer. We here investigate whether optimal  
7 timing of two doses of qHPV vaccine could confer the same level of protection  
8 against condyloma as a standard three dose-schedule on a population level in Sweden.  
9  
10  
11  
12  
13  
14  
15  
16  
17

## 18 **METHODS**

### 19 **Study population**

20  
21  
22  
23 This study was a nationwide open cohort of girls and young women aged 10-27 and  
24 registered as living in Sweden between 1<sup>st</sup> January 2006 and 31<sup>st</sup> December 2012.  
25  
26  
27  
28  
29  
30  
31  
32  
33  
34  
35  
36  
37  
38  
39  
40  
41  
42  
43  
44  
45  
46  
47  
48  
49  
50  
51  
52  
53  
54  
55  
56  
57  
58  
59  
60  
Subjects entered the study cohort on the date of administration of the second dose of  
qHPV vaccine and were followed up for first occurrence of condyloma. The cohort of  
girls was sampled prior to the implementation of the two-dose schedule in Sweden i.e.  
girls and women were sampled during a three-dose schedule period.

To ensure only incident condyloma infection was measured, all individuals with  
condyloma diagnosis prior to follow up were excluded, as were individuals who  
emigrated or received bivalent HPV vaccine before follow up. Women that initiated  
qHPV vaccination over the age of 20 or turned 27 years of age before start of follow-  
up were also excluded (Figure 1). Women were censored during follow up if they  
died (n=58), received a condyloma diagnosis (n=619), emigrated (n=1037), were not  
resident in Sweden (N=4) or received the bivalent HPV vaccine (N=38).

### Data sources

Data were collected using the Swedish national population registers and linked through use of unique personal identification numbers.[10] The Swedish HPV Vaccination Register (SVEVAC), a voluntary national HPV vaccination register initiated in 2006, was used for information on HPV vaccination exposure. Timing between doses was calculated using data from this register. In addition to SVEVAC, data was also collected from the Prescribed Drug Register (PDR), which contains information on all prescriptions handled at Swedish pharmacies since July 2005. The Patient Register and PDR were used to extract information on condyloma outcomes. The Patient Register contains data regarding all inpatient and outpatient visits in Swedish hospitals and specialist care since 1987 and 2001, respectively. Information regarding deaths was collected from the Cause of Death Register and emigration status was collected from the Migration Register. Parents were identified from the Multigeneration Register and their highest education level nearest to the date of entry, as a proxy for socioeconomic status, was identified from the Education Register.

### Case definition

Condyloma cases were defined as a first diagnosis of condyloma in the Patient Register or a prescription for condyloma specific treatments in the PDR. In the Patient Register, all women that received a main or secondary diagnosis of condyloma were identified using the ICD10 code A63.0.[11] In the PDR, all women who received podophyllotoxin and imiquimod were identified using Anatomical Therapeutic Chemical Codes (ATC) D06BB04 and D06BB10 respectively.[12]

### Vaccination status

1  
2  
3 SVEVAC was used to obtain bivalent and quadrivalent HPV vaccination dates and  
4  
5 was complemented with prescription data collected from the PDR, using ATC codes  
6  
7 J07BM01 and J07BM02, respectively.  
8  
9

### 10 11 **Statistical analysis**

12  
13  
14 Crude incidence rates (IRs) per 100 000 person-years were calculated as the number  
15  
16 of cases of condyloma per accrued person-time, stratified by the time interval between  
17  
18 first and second dose (0-3, 4-7, or 8+ months). As we have previously shown an effect  
19  
20 of age at vaccination on vaccine effectiveness,[12, 13] girls and women were grouped  
21  
22 into two age-at-first-vaccination categories (10-16 and 17-19 years), a divide  
23  
24 reflecting the median age for sexual debut in Sweden at 16.5 years.[14]  
25  
26  
27

28  
29  
30 Poisson regression was used to model IRs by time between first and second dose and  
31  
32 age at first vaccination and adjusted for attained age. The time scale for individual  
33  
34 follow-up was attained age, which was split into five intervals (10-13, 14-16, 17-19,  
35  
36 20-21 and 22+ years), to reflect increasing risk of infection and disease with  
37  
38 increasing age. Vaccine dosage (three versus two doses) was handled as a time-  
39  
40 varying exposure, so that women could contribute person-time to both dose  
41  
42 categories. The effect of time between doses was allowed to vary by age at first  
43  
44 vaccination via an interaction term. This model was then used to estimate incidence  
45  
46 rate ratios (IRRs) and 95% confidence intervals (CIs) after two doses of qHPV  
47  
48 relative to three sets of references groups: first, compared to women who had initiated  
49  
50 vaccination at the same age and had received three doses of qHPV (0, 2 and 6  
51  
52 months); these IRRs measure effectiveness of a two-dose schedule with different  
53  
54 timings between dose one and two relative to a standard three-dose schedule. Second,  
55  
56  
57  
58  
59  
60

1  
2  
3 compared to women who had initiated vaccination at the same age and had received  
4 three doses of qHPV with the same timing between first and second dose (two doses  
5 with 0-3 months vs three doses with 0-3 months etc.); this matched comparison  
6 addresses the question of how much extra protection is gained on average by a third  
7 dose for different timings for the first two. Third, compared to women who had  
8 initiated vaccination at the same age and had received three doses of qHPV with no  
9 restriction on the time between dose one and two or dose two and three; these IRRs  
10 measure effectiveness of a two dose schedule relative to a pragmatic three-dose  
11 schedule. IRs and IR differences (IRDs) with corresponding 95% CIs predicted by the  
12 models and averaged across levels of attained age in the study cohort were also  
13 reported. Furthermore, two sensitivity analyses were carried out. First, to determine  
14 whether socioeconomic status was a confounder in our study, and second, a  
15 sensitivity analysis restricting the time between dose one and two to 12 months was  
16 conducted.

17  
18  
19  
20  
21  
22  
23  
24  
25  
26  
27  
28  
29  
30  
31  
32  
33  
34  
35  
36 **Ethical Approval:** Ethical approval for this study was granted by the Regional  
37 Ethical Review Board of Stockholm, Sweden, which determined that informed  
38 consent from the study participants was not required.

## 39 40 41 42 43 44 45 **RESULTS**

### 46 47 48 49 **Study cohort**

50  
51  
52 264 498 girls under the age of 20 were vaccinated with at least two doses of qHPV at  
53 the end of the study period. Of these, 79 042 (29.9%) received only two doses of  
54 qHPV vaccine and 185 456 (70.1%) received all three doses. The majority  
55  
56  
57  
58  
59  
60

1  
2  
3 (n=154 440, 83.3%) of the individuals fully vaccinated followed the recommended  
4 dosing schedule given at 0, 2, and 6 months. Median time in follow up was 259 days  
5 [interquartile range 186 - 1271 days].  
6  
7  
8  
9

### 10 11 12 **Crude incidence rates**

13  
14 For girls initiating vaccination with qHPV before 17 years the IR after vaccination  
15 with two doses was 84 (95% CI 66 to 108), 95 (95% CI 48 to 190), and 351 (95% CI  
16 168 to 737) per 100 000 person-years, when there were 0-3, 4-7 and 8+ months  
17  
18 between dose one and two, respectively (Table 1).  
19  
20  
21  
22  
23  
24  
25  
26  
27  
28  
29  
30  
31  
32  
33  
34  
35  
36  
37  
38  
39  
40  
41  
42  
43  
44  
45  
46  
47  
48  
49  
50  
51  
52  
53  
54  
55  
56  
57  
58  
59  
60



Table 1. Number of individuals, cases, person-years, and crude IR by age at vaccination initiation and time between dose 1 and 2

| Age at first vaccination | Number of doses | Time between dose 1 and 2 (months) | Individuals (n) | Condyloma cases (n) | Person-years | Crude IR, (95%CI)* |               |
|--------------------------|-----------------|------------------------------------|-----------------|---------------------|--------------|--------------------|---------------|
| ≤16yr                    | 2 doses         | 0-3                                | 204103          | 63                  | 74611        | 84 (66;108)        |               |
|                          |                 | 4-7                                | 8095            | 8                   | 8404         | 95 (48;190)        |               |
|                          |                 | 8+                                 | 1894            | 7                   | 1992         | 351 (168;737)      |               |
|                          | 3 doses         | 0-3                                | 142046          | 222                 | 275495       | 81 (71;92)         |               |
|                          |                 | 4-7                                | 2803            | 8                   | 6619         | 121 (60;242)       |               |
|                          |                 | 8+                                 | 919             | 2                   | 1646         | 121 (30;486)       |               |
|                          |                 | Standard dosing schedule (0, 2, 6) | 122425          | 182                 | 231393       | 79 (68;91)         |               |
|                          | 17-19yr         | 2 doses                            | 0-3             | 46712               | 97           | 23750              | 408 (335;498) |
|                          |                 |                                    | 4-7             | 2965                | 6            | 3886               | 154 (69;344)  |

Lamb 12

|         |                                    |       |     |       |                |
|---------|------------------------------------|-------|-----|-------|----------------|
|         | 8+                                 | 615   | 6   | 995   | 603 (271;1343) |
| 3 doses | 0-3                                | 38705 | 197 | 93908 | 210 (182;241)  |
|         | 4-7                                | 808   | 3   | 2087  | 144 (46;446)   |
|         | 8+                                 | 175   | 0   | 365   | -              |
|         | Standard dosing schedule (0, 2, 6) | 32015 | 146 | 76168 | 192 (163;225)  |

---

\* IR reported per 100 000 person-years

1  
2  
3  
4  
5  
6  
7  
8  
9  
10  
11  
12  
13  
14  
15  
16  
17  
18  
19  
20  
21  
22  
23  
24  
25  
26  
27  
28  
29  
30  
31  
32  
33  
34  
35  
36  
37  
38  
39  
40  
41  
42  
43  
44  
45  
46  
47  
48  
49  
50  
51  
52  
53  
54  
55  
56  
57  
58  
59  
60

Condyloma incidence after two-dose vaccination was higher in girls initiating vaccination after 17 years of age, with IRs of 408 (95% CI 335 to 498), 154 (95% CI 69 to 344), and 603 (95% CI 271 to 1343) per 100 000, when there were 0-3 months, 4-7 months and 8+ months between dose one and two, respectively (Table 1).

### **Incidence rate ratios comparing two doses versus standard three-dose vaccination**

For girls initiating vaccination before the age of 17 there was a statistically significantly increased risk for condyloma when comparing two-dose vaccination 0-3 months apart (IRR 1.96, 95% CI 1.44 to 2.68) and 8+ months apart (IRR 4.36, 95% CI 2.05 to 9.28) to a standard three-dose schedule. No statistically significant association (IRR=1.27, 95% CI 0.63 to 2.58) was found after vaccination with two doses given 4-7 months apart. The IRDs predicted by the model were 59 (95% CI 25 to 92), 16 (95% CI -38 to 71) and 204 (95%CI=8 to 402) extra cases per 100 000 person-years for 0-3 months, 4-7 months and 8+ months between doses one and two, respectively (Table 2).

Lamb 14

Table 2. IR, IRR, and IRD comparing 2 versus 3 dose vaccination by age at vaccination initiation and time between dose 1 and 2, adjusted for attained age

| Age at first vaccination | Number of doses | Time between dose 1 and 2 (months) | IR, 95%CI*    | P-value | IRR, 95%CI       | P-value | IRD, 95%CI*   | P-value |
|--------------------------|-----------------|------------------------------------|---------------|---------|------------------|---------|---------------|---------|
| ≤16yr                    | 3 doses         | Standard dosing schedule (0, 2, 6) | 61 (52;70)    | <0.001  | Ref              | Ref     | Ref           | Ref     |
|                          | 2 doses         | 0-3                                | 119 (88;151)  | <0.001  | 1.96 (1.44;2.68) | <0.001  | 59 (25;92)    | 0.001   |
|                          |                 | 4-7                                | 77 (24;131)   | 0.005   | 1.27 (0.63;2.58) | 0.506   | 17 (-38;71)   | 0.551   |
|                          |                 | 8+                                 | 265 (68;462)  | 0.008   | 4.36 (2.05;9.28) | <0.001  | 205 (8;402)   | 0.042   |
| 17-19yr                  | 3 doses         | Standard dosing schedule (0, 2, 6) | 113 (90;135)  | <0.001  | Ref              | Ref     | Ref           | Ref     |
|                          | 2 doses         | 0-3                                | 239 (187;291) | <0.001  | 2.12 (1.62;2.77) | <0.001  | 126 (73;179)  | <0.001  |
|                          |                 | 4-7                                | 91 (18;165)   | 0.015   | 0.81 (0.36;1.84) | 0.615   | -21 (-97;54)  | 0.580   |
|                          |                 | 8+                                 | 355 (68;643)  | 0.015   | 3.16 (1.40;7.14) | 0.006   | 243 (-44;530) | 0.097   |

\*IR, IRD reported per 100 000 person-years. Reference groups: ≤16yr with 3 doses of qHPV (0,2,6 months) and 17-19yr with 3 doses of qHPV (0,2,6 months)

1  
2  
3 A similar pattern is seen in girls and women initiating vaccination after turning 17,  
4  
5 with increased risks for condyloma after two doses if given 0-3 months (IRR=2.12,  
6  
7 95%CI=1.62 to 2.77) or 8+ months (IRR=3.16 95%CI=1.40 to 7.14) apart was  
8  
9 observed. No association was found when comparing two versus three doses with 4-7  
10  
11 months between dose one and two (IRR=0.81, 95%CI=0.36 to 1.84) (Table 2).  
12  
13

14  
15  
16 The first sensitivity analysis including socioeconomic status revealed no significant  
17  
18 change to the point estimates (see supplementary table 1). In the second sensitivity  
19  
20 analysis the IRRs were comparable, therefore the cut off at 12 months was not applied  
21  
22 (data not shown).  
23  
24  
25  
26

### 27 **Incidence rate ratios comparing two dose versus matched three dose vaccination**

28  
29 Comparing two-dose vaccination, 0-3 months apart, versus three-dose vaccination  
30  
31 with 0-3 months between doses one and two, results remained effectively unchanged  
32  
33 both for girls initiating vaccination prior to age 17 (IRR=1.95, 95% CI=1.44 to 2.64)  
34  
35 and girls initiating vaccination between 17 and 19 years (IRR=1.88, 96%CI=1.46 to  
36  
37 2.42) (Table 3)  
38  
39  
40  
41  
42  
43  
44  
45  
46  
47  
48  
49  
50  
51  
52  
53  
54  
55  
56  
57  
58  
59  
60

Table 3. IR, IRR, and IRD comparing two-dose vaccination with varying time between dose 1 and 2 versus three-dose vaccination by age at vaccination initiation, adjusted for attained age

| Age at first vaccination | Number of doses | Time between dose 1 and 2 (months) | IR, 95%CI*   | P-value | IRR, 95%CI        | P-value | IRD, 95%CI*   | P-value |
|--------------------------|-----------------|------------------------------------|--------------|---------|-------------------|---------|---------------|---------|
| ≤16yr                    | 3 doses         | 0-3                                | 63 (55;72)   | <0.001  | Ref               | Ref     | Ref           | Ref     |
|                          | 2 doses         | 0-3                                | 123 (90;156) | <0.001  | 1.95 (1.44;2.64)  | <0.001  | 60 (26;94)    | <0.001  |
| ≤16yr                    | 3 doses         | 4-7                                | 91 (28;154)  | 0.005   | Ref               | Ref     | Ref           | Ref     |
|                          | 2 doses         | 4-7                                | 79 (24;133)  | 0.005   | 0.87 (0.33;2.32)  | 0.779   | -12 (-95;71)  | 0.779   |
| ≤16yr                    | 3 doses         | 8+                                 | 86 (-33;205) | 0.158   | Ref               | Ref     | Ref           | Ref     |
|                          | 2 doses         | 8+                                 | 270 (70;470) | 0.008   | 3.14 (0.65;15.09) | 0.154   | 184 (-49;417) | 0.122   |

1  
2  
3  
4  
5  
6  
7  
8  
9  
10  
11  
12  
13  
14  
15  
16  
17  
18  
19  
20  
21  
22  
23  
24  
25  
26  
27  
28  
29  
30  
31  
32  
33  
34  
35  
36  
37  
38  
39  
40  
41  
42  
43  
44  
45  
46  
47  
48  
49

|         |         |     |               |        |                  |        |              |        |
|---------|---------|-----|---------------|--------|------------------|--------|--------------|--------|
| 17-19yr | 3 doses | 0-3 | 129 (107;150) | <0.001 | Ref              | Ref    | Ref          | Ref    |
|         | 2 doses | 0-3 | 242 (190;294) | <0.001 | 1.88 (1.46;2.42) | <0.001 | 114 (60;167) | <0.001 |
| 17-19yr | 3 doses | 4-7 | 88 (-12;189)  | 0.084  | Ref              | Ref    | Ref          | Ref    |
|         | 2 doses | 4-7 | 95 (19;172)   | 0.015  | 1.08 (0.27;4.31) | 0.916  | 7 (-119;133) | 0.915  |
| 17-19yr | 3 doses | 8+  | 0             | -      | Ref              | Ref    | Ref          | Ref    |
|         | 2 doses | 8+  | 373 (72;675)  | 0.015  | -                | -      | 373 (72;675) | 0.015  |

---

\* IR, IRD reported per 100 000 person-years. Matched reference groups: ≤16yr with 3 doses of qHPV with 0-3 months between dose 1 and 2, ≤16yr with 3 doses of qHPV with 4-7 months between dose 1 and 2 and ≤16yr with 3 doses of qHPV with 8+ months between dose 1 and 2; 17-19yr with 3 doses of qHPV with 0-3 months between dose 1 and 2, 17-19yr with 3 doses of qHPV with 4-7 months between dose 1 and 2 and 17-19yr with 3 doses of qHPV with 8+ months between dose 1 and 2.

1  
2  
3 Comparing two versus three-dose vaccination with 4-7 and 8+ months between the  
4 first two doses for both schedules, we found non-significant associations with IRRs of  
5 0.87 (95% CI=0.33 to 2.32) and 3.14 (95% CI=0.65 to 15.09) respectively, for girls  
6 initiating vaccination prior to 17, with corresponding IRDs of -12 (95% CI=-95 to 71)  
7 and 184 (95% CI=-49 to 417) cases per 100 000 person-years (Table 3). For girls  
8 initiating vaccination between 17 and 19 years, no association was found for 4-7  
9 months in between doses (IRR=1.08, 95%CI=0.27 to 4.31); no cases of condyloma  
10 were reported in fully vaccinated women initiating vaccination between 17 and 19  
11 years (Table 3).  
12  
13  
14  
15  
16  
17  
18  
19  
20  
21  
22  
23  
24

### 25 **Incidence rate ratios comparing two doses versus pragmatic three dose** 26 **vaccination** 27 28 29 30 31

32 Changing the reference group to pragmatic three-dose vaccination did not materially  
33 affect the results. (See supplementary table 2).  
34  
35  
36  
37

## 38 **DISCUSSION** 39 40 41 42

### 43 **Statement of principle findings** 44

45 This population-based study investigates the incidence of condyloma after two doses  
46 of qHPV by time between first and second dose. Our results suggest that a two-dose  
47 regimen is similarly effective as a standard three-dose schedule if given 4-7 months  
48 apart. This is in line with the recommendations from the European Medicines Agency  
49 (EMA) and the World Health Organization Strategic Advisory Group of Experts  
50 (SAGE) and immunological results from clinical trials.[2, 3, 5, 6, 15-19]  
51  
52  
53  
54  
55  
56  
57  
58  
59  
60



### **In relation to other studies**

The impact of HPV vaccines was first recognised for HPV infections, and HPV-related diseases with short incubation times following infection such as genital warts.[20] Studies have shown that three-dose schedules of qHPV vaccination have been effective in the prevention of genital warts at a population level.[21-24] In addition, observational studies assessing the effectiveness of qHPV against cervical abnormalities have been carried out.[25-28] A recent review by Garland et al. suggested that in successive birth cohorts that are beginning screening, there have been reductions in the number of low-grade cytological abnormalities and high-grade histology confirmed cervical lesions (approximately 45% and 85% respectively).[29]

Alternative dosing schedules on condyloma incidence have been investigated in Denmark and Sweden,[9, 13] with both studies showing that condyloma incidence was statistically significantly higher in women aged 19-24 years after two doses rather than three. However, receipt of two vaccine doses with optimum interval was reported as non-inferior to three doses in terms of condyloma reduction, a finding with which the present study concurs.

### **Strengths and weaknesses**

This was a nationwide study including the entire vaccinated Swedish female population aged 10-27 years. The use of high quality national register-based data meant that we were able to link vaccination status to disease outcome on an individual level.

1  
2  
3 A limitation of our study is that a small proportion of patients will neither seek  
4 hospital care for condyloma nor receive prescription for treatment, and thus will not  
5 be included in the registers, resulting in an underestimation of the true number of  
6 condyloma cases. [12] However, we expect this to be negligible in our study, as a)  
7 vaccinated women have been found to have higher screening uptake than  
8 unvaccinated women and can thus also be assumed not to be less prone to access  
9 healthcare [30] b) it would only inflate the estimated effect of the two-dose regimens  
10 if the subjects less willing to complete the three-dose regimens would be substantially  
11 more likely to see healthcare for genital warts than those who complete three doses.  
12  
13  
14  
15  
16  
17  
18  
19  
20  
21  
22  
23  
24

25 Another potential limitation is that SVEVAC was a voluntary register for the period  
26 2006-2010, with only 80-85% coverage. To avoid an underestimation of vaccination  
27 exposure, we complemented missing data using the Prescribed Drug Register. This  
28 method has been used previously in a study by Herweijer et al, who found unique  
29 vaccination dose dates for 99.6% of the vaccinated girls and women in the cohort.  
30  
31  
32  
33  
34  
35  
36 [13]  
37  
38  
39  
40

41 It is also possible that individuals might have a prevalent HPV infection at time of  
42 vaccination, resulting in an underestimation of protective effect of the vaccine. We  
43 have attempted to control for this by excluding women who had a history of  
44 condyloma before the start of individual follow-up. Additionally, given that we start  
45 follow-up for condyloma incidence only after the second dose, we have the automatic  
46 benefit of a buffer period as used in.[13]  
47  
48  
49  
50  
51  
52  
53  
54  
55  
56  
57  
58  
59  
60

1  
2  
3 It is also of note that, the majority of women in the cohort had 0-3 months between  
4 first and second dose, which limited the power for other exposure groups in our study  
5 and resulted in wider confidence intervals, particularly in comparisons with the older  
6 age group and increasing time between doses. While we did not find socioeconomic  
7 status as a confounder in our study and we hypothesise that this is because we only  
8 follow subjects from the second dose forwards, so there has already been a large  
9 degree of self-selection with regard to the role of socioeconomic factors in our study  
10 participants.  
11  
12  
13  
14  
15  
16  
17  
18  
19

### 20 21 22 23 **Implications**

24 Reducing the number of HPV vaccine doses from three to two could potentially lead  
25 to a number of positive effects, including lower costs, increased compliance and  
26 improved logistics of the vaccination programme. It is however key to remain vigilant  
27 with regards to follow-up of disease outcomes and supplement clinical trial data and  
28 policy recommendations with real-life evidence, such as those presented here. The  
29 findings imply that the current recommendation of two dose-schedules is appropriate,  
30 but we reinforce the significance of optimal timing between doses.  
31  
32  
33  
34  
35  
36  
37  
38  
39  
40  
41  
42

### 43 **Unanswered questions and future research**

44 We did not consider HPV-related disease outcomes other than condyloma. More  
45 studies with longer follow-up time are needed to ascertain the effectiveness of a two-  
46 dose schedule for HPV-related disease outcomes such as cervical intraepithelial  
47 neoplasia or cervical cancer. As more countries implement two-dose schedules, the  
48 impact on transmission dynamics and herd immunity will also become clearer.[22] It  
49 should also be taken into account that the duration of protection for both the two-dose  
50  
51  
52  
53  
54  
55  
56  
57  
58  
59  
60

1  
2  
3 and three-dose schedule is not yet known and more time and data are required before  
4  
5 conclusions can be drawn regarding the long-term effectiveness of these schedules,  
6  
7 and a reduced-dose schedule can be recommended for girls older than 15.[2, 31]  
8  
9

10  
11 The finding that the 8+ months between doses was less protective than the 4-7 month  
12  
13 group was unexpected as for one-dose priming schedules it is often better with a  
14  
15 longer interval between doses. Since this is an observational study, we cannot exclude  
16  
17 that our finding was due to an unmeasured confounding factor however, with some  
18  
19 (unknown) underlying reason why these girls had a longer time to dose three and high  
20  
21 incidence/exposure. While we can only speculate about this higher risk in the 8+  
22  
23 month group, it has highlighted the need for further studies with a longer follow up  
24  
25 time investigating the upper time limit between doses and vaccine effectiveness.  
26  
27  
28  
29

### 30 31 32 **Conclusion**

33  
34 For prevention of condyloma, a two-dose schedule of qHPV vaccine with 4-7 months  
35  
36 between first and second dose may be as effective as standard three-dose vaccination,  
37  
38 for women first vaccinated before the age of 20. The results from this nationwide  
39  
40 observational study support immunogenicity findings from clinical trials.  
41  
42  
43  
44  
45  
46  
47  
48  
49  
50  
51  
52  
53  
54  
55  
56  
57  
58  
59  
60

## REFERENCES

1. Schiller, J.T. and D.R. Lowy, *Raising Expectations For Subunit Vaccine*. J Infect Dis, 2014.
2. Dobson, S.R., et al., *Immunogenicity of 2 doses of HPV vaccine in younger adolescents vs 3 doses in young women: a randomized clinical trial*. JAMA, 2013. **309**(17): p. 1793-802.
3. Lazcano-Ponce, E., et al., *Overcoming barriers to HPV vaccination: non-inferiority of antibody response to human papillomavirus 16/18 vaccine in adolescents vaccinated with a two-dose vs. a three-dose schedule at 21 months*. Vaccine, 2014. **32**(6): p. 725-32.
4. Neuzil, K.M., et al., *Immunogenicity and reactogenicity of alternative schedules of HPV vaccine in Vietnam: a cluster randomized noninferiority trial*. JAMA, 2011. **305**(14): p. 1424-31.
5. Romanowski, B., et al., *Immune response to the HPV-16/18 AS04-adjuvanted vaccine administered as a 2-dose or 3-dose schedule up to 4 years after vaccination: results from a randomized study*. Hum Vaccin Immunother, 2014. **10**(5): p. 1155-65.
6. Romanowski, B., et al., *Immunogenicity and safety of the HPV-16/18 AS04-adjuvanted vaccine administered as a 2-dose schedule compared with the licensed 3-dose schedule: results from a randomized study*. Hum Vaccin, 2011. **7**(12): p. 1374-86.
7. WHO. *Human papillomavirus vaccines: WHO position paper, October 2014*. Available from: <http://www.who.int/wer/2014/wer8943.pdf?ua=1>.
8. European Medicines Agency, *Assessment report Gardasil 2014*.
9. Blomberg, M., et al., *Dose-Related Differences in Effectiveness of Human Papillomavirus Vaccination Against Genital Warts: A Nationwide Study of 550 000 Young Girls*. Clin Infect Dis, 2015.
10. Ludvigsson, J.F., et al., *The Swedish personal identity number: possibilities and pitfalls in healthcare and medical research*. Eur J Epidemiol, 2009. **24**(11): p. 659-67.
11. World Health Organisation. *International Classification of Disease, Tenth Revision*. 2010.
12. Leval, A., et al., *Quadrivalent human papillomavirus vaccine effectiveness: a Swedish national cohort study*. J Natl Cancer Inst, 2013. **105**(7): p. 469-74.
13. Herweijer, E., et al., *Association of varying number of doses of quadrivalent human papillomavirus vaccine with incidence of condyloma*. JAMA, 2014. **311**(6): p. 597-603.
14. Jensen, K.E., et al., *Women's sexual behavior. Population-based study among 65,000 women from four Nordic countries before introduction of human papillomavirus vaccination*. Acta Obstet Gynecol Scand, 2011. **90**(5): p. 459-67.
15. Donken, R., et al., *Inconclusive evidence for non-inferior immunogenicity of two- compared with three-dose HPV immunization schedules in preadolescent girls: A systematic review and meta-analysis*. J Infect, 2015. **71**(1): p. 61-73.
16. Hernandez-Avila, M., et al., *Evaluation of the immunogenicity of the quadrivalent HPV vaccine using 2 versus 3 doses at month 21: An*

- 1  
2  
3 *epidemiological surveillance mechanism for alternate vaccination schemes.*  
4 Hum Vaccin Immunother, 2016. **12**(1): p. 30-8.
- 5 17. Kraiden, M., et al., *Assessment of HPV 16 and HPV 18 antibody responses by*  
6 *pseudovirus neutralization, Merck cLIA and Merck total IgG LIA*  
7 *immunoassays in a reduced dosage quadrivalent HPV vaccine trial.* Vaccine,  
8 2014. **32**(5): p. 624-30.
- 9  
10 18. Romanowski, B., et al., *Sustained immunogenicity of the HPV-16/18 AS04-*  
11 *adjuvanted vaccine administered as a two-dose schedule in adolescent girls:*  
12 *Five-year clinical data and modeling predictions from a randomized study.*  
13 Hum Vaccin Immunother, 2016. **12**(1): p. 20-9.
- 14 19. Safaeian, M., et al., *Durable antibody responses following one dose of the*  
15 *bivalent human papillomavirus L1 virus-like particle vaccine in the Costa*  
16 *Rica Vaccine Trial.* Cancer Prev Res (Phila), 2013. **6**(11): p. 1242-50.
- 17 20. Mariani, L., et al., *Early direct and indirect impact of quadrivalent HPV*  
18 *(4HPV) vaccine on genital warts: a systematic review.* Adv Ther, 2015.  
19 **32**(1): p. 10-30.
- 20  
21 21. Bogaards, J.A. and J. Berkhof, *Assessment of herd immunity from human*  
22 *papillomavirus vaccination.* Lancet Infect Dis, 2011. **11**(12): p. 896; author  
23 reply 896-7.
- 24 22. Donken, R., et al., *An exploration of individual- and population-level impact*  
25 *of the 2-dose HPV vaccination schedule in pre-adolescent girls.* Hum Vaccin  
26 Immunother, 2016. **12**(6): p. 1381-93.
- 27  
28 23. Donovan, B., et al., *Quadrivalent human papillomavirus vaccination and*  
29 *trends in genital warts in Australia: analysis of national sentinel*  
30 *surveillance data.* Lancet Infect Dis, 2011. **11**(1): p. 39-44.
- 31 24. Smith, M.A., et al., *Fall in genital warts diagnoses in the general and*  
32 *indigenous Australian population following implementation of a national*  
33 *human papillomavirus vaccination program: analysis of routinely collected*  
34 *national hospital data.* J Infect Dis, 2015. **211**(1): p. 91-9.
- 35  
36 25. Crowe, E., et al., *Effectiveness of quadrivalent human papillomavirus*  
37 *vaccine for the prevention of cervical abnormalities: case-control study*  
38 *nested within a population based screening programme in Australia.* BMJ,  
39 2014. **348**: p. g1458.
- 40 26. Gertig, D.M., et al., *Impact of a population-based HPV vaccination program*  
41 *on cervical abnormalities: a data linkage study.* BMC Med, 2013. **11**: p. 227.
- 42 27. Herweijer, E., et al., *Quadrivalent HPV vaccine effectiveness against high-*  
43 *grade cervical lesions by age at vaccination: A population-based study.* Int J  
44 Cancer, 2016. **138**(12): p. 2867-74.
- 45 28. Svahn, M.F., et al., *Burden and incidence of human papillomavirus-*  
46 *associated cancers and precancerous lesions in Denmark.* Scand J Public  
47 Health, 2016. **44**(6): p. 551-9.
- 48 29. Garland, S.M., et al., *Impact and Effectiveness of the Quadrivalent Human*  
49 *Papillomavirus Vaccine: A Systematic Review of 10 Years of Real-world*  
50 *Experience.* Clin Infect Dis, 2016. **63**(4): p. 519-27.
- 51  
52 30. Herweijer, E., et al., *The Participation of HPV-Vaccinated Women in a*  
53 *National Cervical Screening Program: Population-Based Cohort Study.* PLoS  
54 One, 2015. **10**(7): p. e0134185.  
55  
56  
57  
58  
59  
60

1  
2  
3  
4  
5  
6  
7  
8  
9  
10  
11  
12  
13  
14  
15  
16  
17  
18  
19  
20  
21  
22  
23  
24  
25  
26  
27  
28  
29  
30  
31  
32  
33  
34  
35  
36  
37  
38  
39  
40  
41  
42  
43  
44  
45  
46  
47  
48  
49  
50  
51  
52  
53  
54  
55  
56  
57  
58  
59  
60

31. Jit, M., et al., *Comparison of two dose and three dose human papillomavirus vaccine schedules: cost effectiveness analysis based on transmission model.* BMJ, 2015. **350**: p. g7584.

For peer review only

1  
2  
3 Figure 1. Details on study exclusions and the population analysed to investigate  
4 timing of two versus three doses of quadrivalent HPV vaccine and associated  
5 effectiveness against condyloma.  
6  
7  
8  
9  
10  
11  
12  
13  
14  
15  
16  
17  
18  
19  
20  
21  
22  
23  
24  
25  
26  
27  
28  
29  
30  
31  
32  
33  
34  
35  
36  
37  
38  
39  
40  
41  
42  
43  
44  
45  
46  
47  
48  
49  
50  
51  
52  
53  
54  
55  
56  
57  
58  
59  
60



1  
2  
3  
4  
5  
6  
7  
8  
9  
10  
11  
12  
13  
14  
15  
16  
17  
18  
19  
20  
21  
22  
23  
24  
25  
26  
27  
28  
29  
30  
31  
32  
33  
34  
35  
36  
37  
38  
39  
40  
41  
42  
43  
44  
45  
46  
47  
48  
49  
50  
51  
52  
53  
54  
55  
56  
57  
58  
59  
60

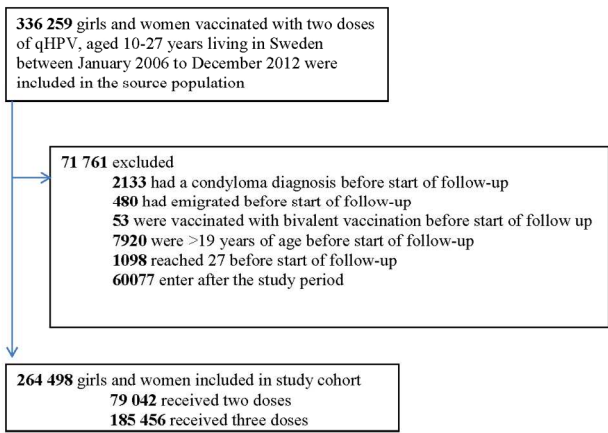

210x297mm (300 x 300 DPI)

Supplementary Table 1. IR, IRR, and IRD comparing 2 versus 3 dose vaccination by age at vaccination initiation and time between dose 1 and 2, adjusted for attained age and education level¶.

| Age at first vaccination | Number of doses | Time between dose 1 and 2 (months) | IR, 95%CI*    | P-value | IRR, 95%CI       | P-value | IRD, 95%CI*   | P-value |
|--------------------------|-----------------|------------------------------------|---------------|---------|------------------|---------|---------------|---------|
| ≤16yr                    | 3 doses         | Standard dosing schedule (0, 2, 6) | 62 (53;72)    | <0.001  | Ref              | Ref     | Ref           | Ref     |
|                          | 2 doses         | 0-3                                | 122 (89;155)  | <0.001  | 1.96 (1.43;2.70) | <0.001  | 60 (25;95)    | 0.001   |
|                          |                 | 4-7                                | 73 (19;128)   | 0.008   | 1.17 (0.55;2.51) | 0.669   | 11 (-44;66)   | 0.692   |
|                          |                 | 8+                                 | 250 (49;450)  | 0.015   | 4.02 (1.78;9.07) | 0.001   | 188 (13;388)  | 0.067   |
| 17-19yr                  | 3 doses         | Standard dosing schedule (0, 2, 6) | 113 (90;135)  | <0.001  | Ref              | Ref     | Ref           | Ref     |
|                          | 2 doses         | 0-3                                | 244 (189;299) | <0.001  | 2.15 (1.63;2.84) | <0.001  | 131 (75;186)  | <0.001  |
|                          |                 | 4-7                                | 100 (19;181)  | 0.015   | 0.88 (0.39;2.00) | 0.767   | -13 (-95;69)  | 0.754   |
|                          |                 | 8+                                 | 383 (73;694)  | 0.016   | 3.39 (1.50;7.68) | 0.003   | 270 (-39;579) | 0.087   |

\*IR, IRD reported per 100 000 person-years. Reference groups: ≤16yr with 3 doses of qHPV (0,2,6 months) and 17-19yr with 3 doses of qHPV (0,2,6 months).

¶ Highest education level of either parent, nearest to the date of entry, was used as a proxy for socioeconomic status. Individuals with educational information (n=252 768).

Supplementary Table 2. IR, IRR, and IRD comparing 2 versus 3 dose vaccination by age at vaccination initiation and time between dose 1 and 2.

| Age at first vaccination | Number of doses | Time between dose 1 and 2 (months) | IR, 95%CI*    | P-value | IRR, 95%CI       | P-value   | IRD, 95%CI*   | P-value   |
|--------------------------|-----------------|------------------------------------|---------------|---------|------------------|-----------|---------------|-----------|
| ≤16yr                    | 3 doses         | Overall (0-3;4-7;8+)               | 64 (55;72)    | <0.001  | Reference        | Reference | Reference     | Reference |
|                          | 2 doses         | 0-3                                | 123 (90;156)  | <0.001  | 1.92 (1.42;2.60) | <0.001    | 59 (25;93)    | 0.001     |
|                          |                 | 4-7                                | 79 (24;133)   | 0.005   | 1.23 (0.61;2.49) | 0.562     | 15 (-40;70)   | 0.598     |
|                          |                 | 8+                                 | 270 (70;470)  | 0.008   | 4.22 (1.99;8.94) | <0.001    | 206 (6;406)   | 0.044     |
| 17-19yr                  | 3 doses         | Overall (0-3;4-7;8+)               | 127 (106;149) | <0.001  | Reference        | Reference | Reference     | Reference |
|                          | 2 doses         | 0-3                                | 242 (190;294) | <0.001  | 1.9 (1.48;2.45)  | <0.001    | 115 (62;168)  | <0.001    |
|                          |                 | 4-7                                | 95 (19;172)   | 0.015   | 0.75 (0.33;1.69) | 0.484     | -32 (-110;46) | 0.422     |
|                          |                 | 8+                                 | 374 (72;675)  | 0.015   | 2.93 (1.3;6.61)  | 0.009     | 246 (-54;547) | 0.108     |

\* IR, IRD reported per 100 000 person-years, reference groups: ≤16yr with 3 doses of qHPV (no time restriction between dose 1 and 1 and dose 2 and 3) and 17-19yrs with 3 doses of qHPV (no time restriction between dose 1 and 1 and dose 2 and 3).

STROBE 2007 (v4) Statement—Checklist of items that should be included in reports of *cohort studies*

| Section/Topic                | Item # | Recommendation                                                                                                                                                                       | Reported on page # |
|------------------------------|--------|--------------------------------------------------------------------------------------------------------------------------------------------------------------------------------------|--------------------|
| Title and abstract           | 1      | (a) Indicate the study's design with a commonly used term in the title or the abstract                                                                                               | 1, 2               |
|                              |        | (b) Provide in the abstract an informative and balanced summary of what was done and what was found                                                                                  | 2                  |
| <b>Introduction</b>          |        |                                                                                                                                                                                      |                    |
| Background/rationale         | 2      | Explain the scientific background and rationale for the investigation being reported                                                                                                 | 5, 6               |
| Objectives                   | 3      | State specific objectives, including any prespecified hypotheses                                                                                                                     | 6                  |
| <b>Methods</b>               |        |                                                                                                                                                                                      |                    |
| Study design                 | 4      | Present key elements of study design early in the paper                                                                                                                              | 6                  |
| Setting                      | 5      | Describe the setting, locations, and relevant dates, including periods of recruitment, exposure, follow-up, and data collection                                                      | 6, 7, 8            |
| Participants                 | 6      | (a) Give the eligibility criteria, and the sources and methods of selection of participants. Describe methods of follow-up                                                           | 6, 7, 8            |
|                              |        | (b) For matched studies, give matching criteria and number of exposed and unexposed                                                                                                  | N/A                |
| Variables                    | 7      | Clearly define all outcomes, exposures, predictors, potential confounders, and effect modifiers. Give diagnostic criteria, if applicable                                             | 6, 7, 8, 9         |
| Data sources/<br>measurement | 8*     | For each variable of interest, give sources of data and details of methods of assessment (measurement). Describe comparability of assessment methods if there is more than one group | 7                  |
| Bias                         | 9      | Describe any efforts to address potential sources of bias                                                                                                                            | 6                  |
| Study size                   | 10     | Explain how the study size was arrived at                                                                                                                                            | 6                  |
| Quantitative variables       | 11     | Explain how quantitative variables were handled in the analyses. If applicable, describe which groupings were chosen and why                                                         | 8, 9               |
| Statistical methods          | 12     | (a) Describe all statistical methods, including those used to control for confounding                                                                                                | 8, 9               |
|                              |        | (b) Describe any methods used to examine subgroups and interactions                                                                                                                  | 8, 9               |
|                              |        | (c) Explain how missing data were addressed                                                                                                                                          | N/A                |
|                              |        | (d) If applicable, explain how loss to follow-up was addressed                                                                                                                       | N/A                |
|                              |        | (e) Describe any sensitivity analyses                                                                                                                                                | 9                  |
| <b>Results</b>               |        |                                                                                                                                                                                      |                    |

|                          |     |                                                                                                                                                                                                              |                |
|--------------------------|-----|--------------------------------------------------------------------------------------------------------------------------------------------------------------------------------------------------------------|----------------|
| Participants             | 13* | (a) Report numbers of individuals at each stage of study—eg numbers potentially eligible, examined for eligibility, confirmed eligible, included in the study, completing follow-up, and analysed            | 6, 9, 10       |
|                          |     | (b) Give reasons for non-participation at each stage                                                                                                                                                         | 6              |
|                          |     | (c) Consider use of a flow diagram                                                                                                                                                                           | 6              |
| Descriptive data         | 14* | (a) Give characteristics of study participants (eg demographic, clinical, social) and information on exposures and potential confounders                                                                     |                |
|                          |     | (b) Indicate number of participants with missing data for each variable of interest                                                                                                                          | N/A            |
|                          |     | (c) Summarise follow-up time (eg, average and total amount)                                                                                                                                                  | 9, 10          |
| Outcome data             | 15* | Report numbers of outcome events or summary measures over time                                                                                                                                               | 9, 10          |
| Main results             | 16  | (a) Give unadjusted estimates and, if applicable, confounder-adjusted estimates and their precision (eg, 95% confidence interval). Make clear which confounders were adjusted for and why they were included | 10-18          |
|                          |     | (b) Report category boundaries when continuous variables were categorized                                                                                                                                    | N/A            |
|                          |     | (c) If relevant, consider translating estimates of relative risk into absolute risk for a meaningful time period                                                                                             | N/A            |
| Other analyses           | 17  | Report other analyses done—eg analyses of subgroups and interactions, and sensitivity analyses                                                                                                               | 15, 18         |
| <b>Discussion</b>        |     |                                                                                                                                                                                                              |                |
| Key results              | 18  | Summarise key results with reference to study objectives                                                                                                                                                     | 18             |
| <b>Limitations</b>       |     |                                                                                                                                                                                                              |                |
| Interpretation           | 20  | Give a cautious overall interpretation of results considering objectives, limitations, multiplicity of analyses, results from similar studies, and other relevant evidence                                   | 19, 20, 21, 22 |
| Generalisability         | 21  | Discuss the generalisability (external validity) of the study results                                                                                                                                        | 20, 21, 22     |
| <b>Other information</b> |     |                                                                                                                                                                                                              |                |
| Funding                  | 22  | Give the source of funding and the role of the funders for the present study and, if applicable, for the original study on which the present article is based                                                | 3              |

\*Give information separately for cases and controls in case-control studies and, if applicable, for exposed and unexposed groups in cohort and cross-sectional studies.

**Note:** An Explanation and Elaboration article discusses each checklist item and gives methodological background and published examples of transparent reporting. The STROBE checklist is best used in conjunction with this article (freely available on the Web sites of PLoS Medicine at <http://www.plosmedicine.org/>, Annals of Internal Medicine at <http://www.annals.org/>, and Epidemiology at <http://www.epidem.com/>). Information on the STROBE Initiative is available at [www.strobe-statement.org](http://www.strobe-statement.org).

# BMJ Open

## TIMING OF TWO VERSUS THREE DOSES OF QUADRIVALENT HPV VACCINE AND ASSOCIATED EFFECTIVENESS AGAINST CONDYLOMA IN SWEDEN: A NATIONWIDE COHORT STUDY.

|                                 |                                                                                                                                                                                                                                                                                                                                                                                                                                                                                                                                                    |
|---------------------------------|----------------------------------------------------------------------------------------------------------------------------------------------------------------------------------------------------------------------------------------------------------------------------------------------------------------------------------------------------------------------------------------------------------------------------------------------------------------------------------------------------------------------------------------------------|
| Journal:                        | <i>BMJ Open</i>                                                                                                                                                                                                                                                                                                                                                                                                                                                                                                                                    |
| Manuscript ID                   | bmjopen-2016-015021.R2                                                                                                                                                                                                                                                                                                                                                                                                                                                                                                                             |
| Article Type:                   | Research                                                                                                                                                                                                                                                                                                                                                                                                                                                                                                                                           |
| Date Submitted by the Author:   | 14-Mar-2017                                                                                                                                                                                                                                                                                                                                                                                                                                                                                                                                        |
| Complete List of Authors:       | Lamb, Favelle; Karolinska Institutet, Medical Epidemiology and Biostatistics<br>Herweijer, Eva; Karolinska Institutet, Medical Epidemiology and Biostatistics<br>Ploner, Alexander; Karolinska Institutet, Medical Epidemiology and Biostatistics<br>Uhnöo, Ingrid; Folkhälsomyndigheten<br>Sundström, Karin; Karolinska Institutet, Medical Epidemiology and Biostatistics<br>Sparén, Pär; Karolinska Institutet, Medical Epidemiology and Biostatistics<br>Arnhem-Dahlström, Lisen; Karolinska institute, Medical Epidemiology and Biostatistics |
| <b>Primary Subject Heading</b>: | Epidemiology                                                                                                                                                                                                                                                                                                                                                                                                                                                                                                                                       |
| Secondary Subject Heading:      | Public health, Infectious diseases                                                                                                                                                                                                                                                                                                                                                                                                                                                                                                                 |
| Keywords:                       | INFECTIOUS DISEASES, EPIDEMIOLOGY, PREVENTIVE MEDICINE, PUBLIC HEALTH                                                                                                                                                                                                                                                                                                                                                                                                                                                                              |
|                                 |                                                                                                                                                                                                                                                                                                                                                                                                                                                                                                                                                    |

SCHOLARONE™  
Manuscripts

1  
2  
3 **TIMING OF TWO VERSUS THREE DOSES OF QUADRIVALENT HPV**  
4 **VACCINE AND ASSOCIATED EFFECTIVENESS AGAINST CONDYLOMA**  
5 **IN SWEDEN: A NATIONWIDE COHORT STUDY.**  
6  
7  
8

9 Lamb F<sup>1</sup>, Herweijer E<sup>1</sup>, Ploner A<sup>2</sup>, Uhnöo I<sup>3</sup>, Sundström K<sup>4</sup>, Sparén P<sup>5\*</sup>, Arnheim-  
10 Dahlström L<sup>6</sup>  
11  
12

13  
14  
15  
16 <sup>1</sup> PhD Student, Karolinska Institutet, Department of Medical Epidemiology and  
17 Biostatistics, Nobels Väg 12A, SE-171 77 Stockholm, Sweden  
18

19  
20  
21 <sup>2</sup> Senior Biostatistician, Karolinska Institutet, Department of Medical Epidemiology  
22 and Biostatistics, Nobels Väg 12A, SE-171 77 Stockholm, Sweden  
23

24  
25 <sup>3</sup> Senior Expert, Associate Professor, Public Health Agency of Sweden, 171 82,  
26 Solna, Stockholm, Sweden  
27

28  
29 <sup>4</sup> PhD and MD, Karolinska Institutet, Department of Laboratory Medicine, Alfreds  
30 Nobels Allé 8, 141 83, Stockholm, Sweden  
31

32  
33 <sup>5</sup> Professor, Karolinska Institutet, Department of Medical Epidemiology and  
34 Biostatistics, Nobels Väg 12A, SE-171 77 Stockholm, Sweden  
35

36  
37 <sup>6</sup> Associate Professor, Karolinska Institutet, Department of Medical Epidemiology  
38 and Biostatistics, Nobels Väg 12A, SE-171 77 Stockholm, Sweden  
39  
40  
41

42  
43  
44  
45 \*Correspondence to: Department of Medical Epidemiology and Biostatistics, Nobels  
46 Väg 12A, SE-171 77 Stockholm, Sweden. Email: par.sparen@ki.se, phone: +46  
47 852486102  
48  
49

50  
51  
52 Word count text: 3110

53  
54 Word count abstract: 288  
55  
56  
57  
58  
59  
60

## ABSTRACT

### Objective

To assess incidence of condyloma after two doses of quadrivalent HPV (qHPV)-vaccine, by time since first vaccine dose, in girls and women initiating vaccination before age 20.

**Design:** Register-based nationwide open cohort study

**Setting:** Sweden

**Participants:** Girls and women initiating qHPV vaccination before age 20 between 2006 and 2012. The study cohort included 264 498 girls, of whom 72 042 had received two doses of qHPV vaccine and 185 456 had received all 3 doses.

**Main outcome measure:** Incidence rate ratios (IRRs) of condyloma estimated by time between first and second dose of qHPV in months (m) and age at vaccination, adjusted for attained age.

**Results:** For girls first vaccinated with two doses before the age of 17, the IRR of condyloma for 0-3m between first and second dose was 1.96 (95% CI 1.43 to 2.68) as compared to standard three-dose schedule. The IRRs were 1.27 (95% CI 0.63 to 2.58) and 4.36 (95% CI=2.05 to 9.28) after receipt of two doses with 4-7m and 8+m between doses, respectively. For women first vaccinated after the age of 17, vaccination with two doses of qHPV vaccine and 0-3m between doses was associated with an IRR of 2.12 (95% CI=1.62 to 2.77). For an interval of 4-7m between doses, the IRR did not statistically significantly differ to the standard three-dose schedule (IRR=0.81, 95% CI= 0.36 to 1.84). For women with 8+m between dose one and two the IRR was 3.16 (95% CI=1.40 to 7.14).

### Conclusion



1  
2  
3 A two-dose schedule for qHPV vaccine with 4-7 months between first and second  
4  
5 dose may be as effective against condyloma in girls and women initiating vaccination  
6  
7 under 20 years as a three-dose schedule. Results from this nationwide study support  
8  
9 immunogenicity data from clinical trials.  
10

### 11 12 13 14 **Strengths and limitations of this study**

- 15  
16  
17  
18 • We were able to link vaccination status to disease outcome on an individual  
19  
20 level through use of high quality national register-based data.
- 21  
22  
23 • Observation studies such as this, are able to look at the pragmatic  
24  
25 effectiveness of vaccination in a large population.
- 26  
27  
28 • We did not look at HPV disease outcomes other than condyloma.
- 29  
30  
31 • The majority of girls and women in the cohort had 0-3 months between first  
32  
33 and second dose, which limited the power for other exposure groups in our  
34  
35 study.
- 36  
37  
38 • A small proportion of condyloma cases may have been missed, as some  
39  
40 patients will neither seek hospital care for condyloma nor receive prescription  
41  
42 for treatment, and thus will not be included in the registers.  
43  
44

45  
46 **Funding:** This study was supported by the Swedish Foundation for Strategic research  
47  
48 grant number KF10-0046. The funder had no role in the design and conduct of the  
49  
50 study; collection, management, analysis, and interpretation of the data; preparation,  
51  
52 review, and approval of manuscript or decision to submit the manuscript for  
53  
54 publication.  
55  
56  
57  
58  
59  
60

1  
2  
3 **Competing interests:** All authors have completed the ICMJE uniform disclosure  
4 form at [www.icmje.org/coi\\_disclosure.pdf](http://www.icmje.org/coi_disclosure.pdf) and declare: no support from any  
5 organisation for the submitted work; LAD has received research grants to her  
6 institution for other studies from MSD Sanofi Pasteur, Merck Sharp and Dohme, and  
7 GlaxoSmithKline. KS has received grants from Merck Sharp and Dohme for other  
8 studies on HPV vaccination in Sweden; no other relationships or activities that could  
9 appear to have influenced the submitted work.  
10  
11  
12  
13  
14  
15  
16  
17  
18  
19

20  
21 **Data sharing:** The study utilises unique individual level Swedish register data,  
22 which cannot be shared in the public domain according to Swedish law. The  
23 individual-level data underlying the study will be available from the corresponding  
24 author upon request, given that appropriate ethical and legal requirements are met.  
25  
26  
27  
28  
29  
30

31  
32 **Contributors:** FL, EH, AP, KS, IU, PS and LAD contributed to the design of the  
33 study; FL, EH, AP and PS analysed the data; FL drafted the manuscript; FL, EH, AP,  
34 KS, IU, PS and LAD critically reviewed the manuscript; FL, EH, AP, KS, IU, PS and  
35 LAD and prepared the manuscript for submission; LAD is the guarantor of the study.  
36  
37  
38  
39  
40  
41  
42  
43  
44  
45  
46  
47  
48  
49  
50  
51  
52  
53  
54  
55  
56  
57  
58  
59  
60

## INTRODUCTION

Human Papillomavirus (HPV) vaccines are subunit vaccines containing virus-like particles (VLPs), and typically require multiple doses to confer an immune response,[1] therefore, a three-dose schedule (0, 2, 6 months) was initially approved by the European Medicines Agency (EMA). As the immune response has been shown to be stronger in young girls 9-14 years of age compared to women 15-25 years of age, recommendations to reduce the number of doses to two have been put forward for the younger age groups, provided doses are optimally spaced.[2-6] Thus, in 2014, HPV vaccines were licensed in a two-dose schedule for girls aged between 9-14 years of age with doses at 0 and 6 months.[7, 8]

In Sweden, HPV vaccination was originally introduced as part of a subsidised three-dose schedule in 2007 for girls and women aged 13-17 years. Other ages could still be vaccinated, but were required to pay the full cost of the vaccine. In 2012, an organised national programme was initiated, with girls aged 10-12 routinely vaccinated as part of the childhood vaccination programme. Catch-up vaccinations were offered to girls aged 13-18 years. In January 2015, a two-dose schedule for girls aged 10-13 was implemented.

Several potential benefits may be conferred by such a reduced dosing schedule; including increased compliance, lower programme costs and improved logistics. However, the recommendation for a two-dose schedule was based on immunogenicity results and does not take into account the antibody threshold at which HPV diseases may be prevented – a threshold that has yet to be identified.[9] Therefore,

1  
2  
3 observational studies are necessary to ascertain effects of dose alterations in HPV  
4 vaccination on clinical endpoints. The use of condyloma as a marker for vaccine  
5 effectiveness is in this context timely, due to its considerably shorter latency period  
6 than precancerous cervical lesions and cancer. We here investigate whether optimal  
7 timing of two doses of qHPV vaccine could confer the same level of protection  
8 against condyloma as a standard three dose-schedule on a population level in Sweden.  
9  
10  
11  
12  
13  
14  
15  
16  
17

## 18 **METHODS**

### 20 **Study population**

21  
22  
23 This study was a nationwide open cohort of girls and young women aged 10-27 and  
24 registered as living in Sweden between 1<sup>st</sup> January 2006 and 31<sup>st</sup> December 2012.  
25  
26  
27  
28  
29  
30  
31  
32  
33  
34  
35  
36  
37  
38  
39  
40  
41  
42  
43  
44  
45  
46  
47  
48  
49  
50  
51  
52  
53  
54  
55  
56  
57  
58  
59  
60  
Subjects entered the study cohort on the date of administration of the second dose of  
qHPV vaccine and were followed up for first occurrence of condyloma. The cohort of  
girls was sampled prior to the implementation of the two-dose schedule in Sweden i.e.  
girls and women were sampled during a three-dose schedule period.

To ensure only incident condyloma infection was measured, all individuals with  
condyloma diagnosis prior to follow up were excluded, as were individuals who  
emigrated or received bivalent HPV vaccine before follow up. Women that initiated  
qHPV vaccination over the age of 20 or turned 27 years of age before start of follow-  
up were also excluded (Figure 1). Women were censored during follow up if they  
died (n=58), received a condyloma diagnosis (n=619), emigrated (n=1037), were not  
resident in Sweden (N=4) or received the bivalent HPV vaccine (N=38).

### Data sources

Data were collected using the Swedish national population registers and linked through use of unique personal identification numbers.[10] The Swedish HPV Vaccination Register (SVEVAC), a voluntary national HPV vaccination register initiated in 2006, was used for information on HPV vaccination exposure. Timing between doses was calculated using data from this register. In addition to SVEVAC, data was also collected from the Prescribed Drug Register (PDR), which contains information on all prescriptions handled at Swedish pharmacies since July 2005. The Patient Register and PDR were used to extract information on condyloma outcomes. The Patient Register contains data regarding all inpatient and outpatient visits in Swedish hospitals and specialist care since 1987 and 2001, respectively. Information regarding deaths was collected from the Cause of Death Register and emigration status was collected from the Migration Register. Parents were identified from the Multigeneration Register and their highest education level nearest to the date of entry, as a proxy for socioeconomic status, was identified from the Education Register.

### Case definition

Condyloma cases were defined as a first diagnosis of condyloma in the Patient Register or a prescription for condyloma specific treatments in the PDR. In the Patient Register, all women that received a main or secondary diagnosis of condyloma were identified using the ICD10 code A63.0.[11] In the PDR, all women who received podophyllotoxin and imiquimod were identified using Anatomical Therapeutic Chemical Codes (ATC) D06BB04 and D06BB10 respectively.[12]

### Vaccination status

1  
2  
3 SVEVAC was used to obtain bivalent and quadrivalent HPV vaccination dates and  
4  
5 was complemented with prescription data collected from the PDR, using ATC codes  
6  
7 J07BM01 and J07BM02, respectively.  
8  
9

### 10 11 **Statistical analysis**

12  
13  
14 Crude incidence rates (IRs) per 100 000 person-years were calculated as the number  
15  
16 of cases of condyloma per accrued person-time, stratified by the time interval between  
17  
18 first and second dose (0-3, 4-7, or 8+ months). As we have previously shown an effect  
19  
20 of age at vaccination on vaccine effectiveness,[12, 13] girls and women were grouped  
21  
22 into two age-at-first-vaccination categories (10-16 and 17-19 years), a divide  
23  
24 reflecting the median age for sexual debut in Sweden at 16.5 years.[14]  
25  
26  
27

28  
29  
30 Poisson regression was used to model IRs by time between first and second dose and  
31  
32 age at first vaccination and adjusted for attained age. The time scale for individual  
33  
34 follow-up was attained age, which was split into five intervals (10-13, 14-16, 17-19,  
35  
36 20-21 and 22+ years), to reflect increasing risk of infection and disease with  
37  
38 increasing age. Vaccine dosage (three versus two doses) was handled as a time-  
39  
40 varying exposure, so that women could contribute person-time to both dose  
41  
42 categories. The effect of time between doses was allowed to vary by age at first  
43  
44 vaccination via an interaction term. This model was then used to estimate incidence  
45  
46 rate ratios (IRRs) and 95% confidence intervals (CIs) after two doses of qHPV  
47  
48 relative to three sets of references groups: first, compared to women who had initiated  
49  
50 vaccination at the same age and had received three doses of qHPV (0, 2 and 6  
51  
52 months); these IRRs measure effectiveness of a two-dose schedule with different  
53  
54 timings between dose one and two relative to a standard three-dose schedule. Second,  
55  
56  
57  
58  
59  
60

1  
2  
3 compared to women who had initiated vaccination at the same age and had received  
4 three doses of qHPV with the same timing between first and second dose (two doses  
5 with 0-3 months vs three doses with 0-3 months etc.); this matched comparison  
6 addresses the question of how much extra protection is gained on average by a third  
7 dose for different timings for the first two. Third, compared to women who had  
8 initiated vaccination at the same age and had received three doses of qHPV with no  
9 restriction on the time between dose one and two or dose two and three; these IRRs  
10 measure effectiveness of a two dose schedule relative to a pragmatic three-dose  
11 schedule. IRs and IR differences (IRDs) with corresponding 95% CIs predicted by the  
12 models and averaged across levels of attained age in the study cohort were also  
13 reported. Furthermore, two sensitivity analyses were carried out. First, to determine  
14 whether socioeconomic status was a confounder in our study, and second, a  
15 sensitivity analysis restricting the time between dose one and two to 12 months was  
16 conducted.

17  
18  
19  
20  
21  
22  
23  
24  
25  
26  
27  
28  
29  
30  
31  
32  
33  
34  
35  
36 **Ethical Approval:** Ethical approval for this study was granted by the Regional  
37 Ethical Review Board of Stockholm, Sweden, which determined that informed  
38 consent from the study participants was not required.

## 39 40 41 42 43 44 45 **RESULTS**

### 46 47 48 49 **Study cohort**

50  
51  
52 264 498 girls under the age of 20 were vaccinated with at least two doses of qHPV at  
53 the end of the study period. Of these, 79 042 (29.9%) received only two doses of  
54 qHPV vaccine and 185 456 (70.1%) received all three doses. The majority  
55  
56  
57  
58  
59  
60

1  
2  
3 (n=154 440, 83.3%) of the individuals fully vaccinated followed the recommended  
4 dosing schedule given at 0, 2, and 6 months. Median time in follow up was 259 days  
5 [interquartile range 186 - 1271 days].  
6  
7  
8  
9

### 10 11 12 **Crude incidence rates**

13  
14 For girls initiating vaccination with qHPV before 17 years the IR after vaccination  
15 with two doses was 84 (95% CI 66 to 108), 95 (95% CI 48 to 190), and 351 (95% CI  
16 168 to 737) per 100 000 person-years, when there were 0-3, 4-7 and 8+ months  
17  
18 between dose one and two, respectively (Table 1).  
19  
20  
21  
22  
23  
24  
25  
26  
27  
28  
29  
30  
31  
32  
33  
34  
35  
36  
37  
38  
39  
40  
41  
42  
43  
44  
45  
46  
47  
48  
49  
50  
51  
52  
53  
54  
55  
56  
57  
58  
59  
60



Table 1. Number of individuals, cases, person-years, and crude IR by age at vaccination initiation and time between dose 1 and 2

| Age at first vaccination | Number of doses | Time between dose 1 and 2 (months) | Individuals (n) | Condyloma cases (n) | Person-years | Crude IR, (95%CI)* |               |
|--------------------------|-----------------|------------------------------------|-----------------|---------------------|--------------|--------------------|---------------|
| ≤16yr                    | 2 doses         | 0-3                                | 204103          | 63                  | 74611        | 84 (66;108)        |               |
|                          |                 | 4-7                                | 8095            | 8                   | 8404         | 95 (48;190)        |               |
|                          |                 | 8+                                 | 1894            | 7                   | 1992         | 351 (168;737)      |               |
|                          | 3 doses         | 0-3                                | 142046          | 222                 | 275495       | 81 (71;92)         |               |
|                          |                 | 4-7                                | 2803            | 8                   | 6619         | 121 (60;242)       |               |
|                          |                 | 8+                                 | 919             | 2                   | 1646         | 121 (30;486)       |               |
|                          |                 | Standard dosing schedule (0, 2, 6) | 122425          | 182                 | 231393       | 79 (68;91)         |               |
|                          | 17-19yr         | 2 doses                            | 0-3             | 46712               | 97           | 23750              | 408 (335;498) |
|                          |                 |                                    | 4-7             | 2965                | 6            | 3886               | 154 (69;344)  |

Lamb 12

|         |                                    |       |     |       |                |
|---------|------------------------------------|-------|-----|-------|----------------|
|         | 8+                                 | 615   | 6   | 995   | 603 (271;1343) |
| 3 doses | 0-3                                | 38705 | 197 | 93908 | 210 (182;241)  |
|         | 4-7                                | 808   | 3   | 2087  | 144 (46;446)   |
|         | 8+                                 | 175   | 0   | 365   | -              |
|         | Standard dosing schedule (0, 2, 6) | 32015 | 146 | 76168 | 192 (163;225)  |

\* IR reported per 100 000 person-years

review only

1  
2  
3  
4  
5  
6  
7  
8  
9  
10  
11  
12  
13  
14  
15  
16  
17  
18  
19  
20  
21  
22  
23  
24  
25  
26  
27  
28  
29  
30  
31  
32  
33  
34  
35  
36  
37  
38  
39  
40  
41  
42  
43  
44  
45  
46  
47  
48  
49  
50  
51  
52  
53  
54  
55  
56  
57  
58  
59  
60

Condyloma incidence after two-dose vaccination was higher in girls initiating vaccination after 17 years of age, with IRs of 408 (95% CI 335 to 498), 154 (95% CI 69 to 344), and 603 (95% CI 271 to 1343) per 100 000, when there were 0-3 months, 4-7 months and 8+ months between dose one and two, respectively (Table 1).

### **Incidence rate ratios comparing two doses versus standard three-dose vaccination**

For girls initiating vaccination before the age of 17 there was a statistically significantly increased risk for condyloma when comparing two-dose vaccination 0-3 months apart (IRR 1.96, 95% CI 1.44 to 2.68) and 8+ months apart (IRR 4.36, 95% CI 2.05 to 9.28) to a standard three-dose schedule. No statistically significant association (IRR=1.27, 95% CI 0.63 to 2.58) was found after vaccination with two doses given 4-7 months apart. The IRDs predicted by the model were 59 (95% CI 25 to 92), 16 (95% CI -38 to 71) and 204 (95%CI=8 to 402) extra cases per 100 000 person-years for 0-3 months, 4-7 months and 8+ months between doses one and two, respectively (Table 2).

Lamb 14

Table 2. IR, IRR, and IRD comparing 2 versus 3 dose vaccination by age at vaccination initiation and time between dose 1 and 2, adjusted for attained age

| Age at first vaccination | Number of doses | Time between dose 1 and 2 (months) | IR, 95%CI*    | P-value | IRR, 95%CI       | P-value | IRD, 95%CI*   | P-value |
|--------------------------|-----------------|------------------------------------|---------------|---------|------------------|---------|---------------|---------|
| ≤16yr                    | 3 doses         | Standard dosing schedule (0, 2, 6) | 61 (52;70)    | <0.001  | Ref              | Ref     | Ref           | Ref     |
|                          | 2 doses         | 0-3                                | 119 (88;151)  | <0.001  | 1.96 (1.44;2.68) | <0.001  | 59 (25;92)    | 0.001   |
|                          |                 | 4-7                                | 77 (24;131)   | 0.005   | 1.27 (0.63;2.58) | 0.506   | 17 (-38;71)   | 0.551   |
|                          |                 | 8+                                 | 265 (68;462)  | 0.008   | 4.36 (2.05;9.28) | <0.001  | 205 (8;402)   | 0.042   |
| 17-19yr                  | 3 doses         | Standard dosing schedule (0, 2, 6) | 113 (90;135)  | <0.001  | Ref              | Ref     | Ref           | Ref     |
|                          | 2 doses         | 0-3                                | 239 (187;291) | <0.001  | 2.12 (1.62;2.77) | <0.001  | 126 (73;179)  | <0.001  |
|                          |                 | 4-7                                | 91 (18;165)   | 0.015   | 0.81 (0.36;1.84) | 0.615   | -21 (-97;54)  | 0.580   |
|                          |                 | 8+                                 | 355 (68;643)  | 0.015   | 3.16 (1.40;7.14) | 0.006   | 243 (-44;530) | 0.097   |

\*IR, IRD reported per 100 000 person-years. Reference groups: ≤16yr with 3 doses of qHPV (0,2,6 months) and 17-19yr with 3 doses of qHPV (0,2,6 months)

1  
2  
3 A similar pattern is seen in girls and women initiating vaccination after turning 17,  
4  
5 with increased risks for condyloma after two doses if given 0-3 months (IRR=2.12,  
6  
7 95%CI=1.62 to 2.77) or 8+ months (IRR=3.16 95%CI=1.40 to 7.14) apart was  
8  
9 observed. No association was found when comparing two versus three doses with 4-7  
10  
11 months between dose one and two (IRR=0.81, 95%CI=0.36 to 1.84) (Table 2).  
12  
13

14  
15  
16 The first sensitivity analysis including socioeconomic status revealed no significant  
17  
18 change to the point estimates (see supplementary table 1). In the second sensitivity  
19  
20 analysis the IRRs were comparable, therefore the cut off at 12 months was not applied  
21  
22 (data not shown).  
23  
24  
25  
26

### 27 **Incidence rate ratios comparing two dose versus matched three dose vaccination**

28  
29 Comparing two-dose vaccination, 0-3 months apart, versus three-dose vaccination  
30  
31 with 0-3 months between doses one and two, results remained effectively unchanged  
32  
33 both for girls initiating vaccination prior to age 17 (IRR=1.95, 95% CI=1.44 to 2.64)  
34  
35 and girls initiating vaccination between 17 and 19 years (IRR=1.88, 96%CI=1.46 to  
36  
37 2.42) (Table 3)  
38  
39  
40  
41  
42  
43  
44  
45  
46  
47  
48  
49  
50  
51  
52  
53  
54  
55  
56  
57  
58  
59  
60

Table 3. IR, IRR, and IRD comparing two-dose vaccination with varying time between dose 1 and 2 versus three-dose vaccination by age at vaccination initiation, adjusted for attained age

| Age at first vaccination | Number of doses | Time between dose 1 and 2 (months) | IR, 95%CI*   | P-value | IRR, 95%CI        | P-value | IRD, 95%CI*   | P-value |
|--------------------------|-----------------|------------------------------------|--------------|---------|-------------------|---------|---------------|---------|
| ≤16yr                    | 3 doses         | 0-3                                | 63 (55;72)   | <0.001  | Ref               | Ref     | Ref           | Ref     |
|                          | 2 doses         | 0-3                                | 123 (90;156) | <0.001  | 1.95 (1.44;2.64)  | <0.001  | 60 (26;94)    | <0.001  |
| ≤16yr                    | 3 doses         | 4-7                                | 91 (28;154)  | 0.005   | Ref               | Ref     | Ref           | Ref     |
|                          | 2 doses         | 4-7                                | 79 (24;133)  | 0.005   | 0.87 (0.33;2.32)  | 0.779   | -12 (-95;71)  | 0.779   |
| ≤16yr                    | 3 doses         | 8+                                 | 86 (-33;205) | 0.158   | Ref               | Ref     | Ref           | Ref     |
|                          | 2 doses         | 8+                                 | 270 (70;470) | 0.008   | 3.14 (0.65;15.09) | 0.154   | 184 (-49;417) | 0.122   |

1  
2  
3  
4  
5  
6  
7  
8  
9  
10  
11  
12  
13  
14  
15  
16  
17  
18  
19  
20  
21  
22  
23  
24  
25  
26  
27  
28  
29  
30  
31  
32  
33  
34  
35  
36  
37  
38  
39  
40  
41  
42  
43  
44  
45  
46  
47  
48  
49

|         |         |     |               |        |                  |        |              |        |
|---------|---------|-----|---------------|--------|------------------|--------|--------------|--------|
| 17-19yr | 3 doses | 0-3 | 129 (107;150) | <0.001 | Ref              | Ref    | Ref          | Ref    |
|         | 2 doses | 0-3 | 242 (190;294) | <0.001 | 1.88 (1.46;2.42) | <0.001 | 114 (60;167) | <0.001 |
| 17-19yr | 3 doses | 4-7 | 88 (-12;189)  | 0.084  | Ref              | Ref    | Ref          | Ref    |
|         | 2 doses | 4-7 | 95 (19;172)   | 0.015  | 1.08 (0.27;4.31) | 0.916  | 7 (-119;133) | 0.915  |
| 17-19yr | 3 doses | 8+  | 0             | -      | Ref              | Ref    | Ref          | Ref    |
|         | 2 doses | 8+  | 373 (72;675)  | 0.015  | -                | -      | 373 (72;675) | 0.015  |

---

\* IR, IRD reported per 100 000 person-years. Matched reference groups: ≤16yr with 3 doses of qHPV with 0-3 months between dose 1 and 2, ≤16yr with 3 doses of qHPV with 4-7 months between dose 1 and 2 and ≤16yr with 3 doses of qHPV with 8+ months between dose 1 and 2; 17-19yr with 3 doses of qHPV with 0-3 months between dose 1 and 2, 17-19yr with 3 doses of qHPV with 4-7 months between dose 1 and 2 and 17-19yr with 3 doses of qHPV with 8+ months between dose 1 and 2.

1  
2  
3 Comparing two versus three-dose vaccination with 4-7 and 8+ months between the  
4 first two doses for both schedules, we found non-significant associations with IRRs of  
5 0.87 (95% CI=0.33 to 2.32) and 3.14 (95% CI=0.65 to 15.09) respectively, for girls  
6 initiating vaccination prior to 17, with corresponding IRDs of -12 (95% CI=-95 to 71)  
7 and 184 (95% CI=-49 to 417) cases per 100 000 person-years (Table 3). For girls  
8 initiating vaccination between 17 and 19 years, no association was found for 4-7  
9 months in between doses (IRR=1.08, 95%CI=0.27 to 4.31); no cases of condyloma  
10 were reported in fully vaccinated women initiating vaccination between 17 and 19  
11 years (Table 3).  
12  
13  
14  
15  
16  
17  
18  
19  
20  
21  
22  
23  
24

### 25 **Incidence rate ratios comparing two doses versus pragmatic three dose** 26 **vaccination** 27 28 29

30  
31 Changing the reference group to pragmatic three-dose vaccination did not materially  
32 affect the results. (See supplementary table 2).  
33  
34  
35  
36  
37

## 38 **DISCUSSION**

### 39 **Statement of principle findings**

40  
41  
42  
43 This population-based study investigates the incidence of condyloma after two doses  
44 of qHPV by time between first and second dose. Our results suggest that a two-dose  
45 regimen is similarly effective as a standard three-dose schedule if given 4-7 months  
46 apart. This is in line with the recommendations from the European Medicines Agency  
47 (EMA) and the World Health Organization Strategic Advisory Group of Experts  
48 (SAGE) and immunological results from clinical trials.[2, 3, 5, 6, 15-19]  
49  
50  
51  
52  
53  
54  
55  
56  
57  
58  
59  
60



### **In relation to other studies**

The impact of HPV vaccines was first recognised for HPV infections, and HPV-related diseases with short incubation times following infection such as genital warts.[20] Studies have shown that three-dose schedules of qHPV vaccination have been effective in the prevention of genital warts at a population level.[21-24] In addition, observational studies assessing the effectiveness of qHPV against cervical abnormalities have been carried out.[25-28] A recent review by Garland et al. suggested that in successive birth cohorts that are beginning screening, there have been reductions in the number of low-grade cytological abnormalities and high-grade histology confirmed cervical lesions (approximately 45% and 85% respectively).[29]

Alternative dosing schedules on condyloma incidence have been investigated in Denmark and Sweden,[9, 13] with both studies showing that condyloma incidence was statistically significantly higher in women aged 19-24 years after two doses rather than three. However, receipt of two vaccine doses with optimum interval was reported as non-inferior to three doses in terms of condyloma reduction, a finding with which the present study concurs.

### **Strengths and weaknesses**

This was a nationwide study including the entire vaccinated Swedish female population aged 10-27 years. The use of high quality national register-based data meant that we were able to link vaccination status to disease outcome on an individual level.

1  
2  
3 A limitation of our study is that a small proportion of patients will neither seek  
4 hospital care for condyloma nor receive prescription for treatment, and thus will not  
5 be included in the registers, resulting in an underestimation of the true number of  
6 condyloma cases. [12] However, we expect this to be negligible in our study, as a)  
7 vaccinated women have been found to have higher screening uptake than  
8 unvaccinated women and can thus also be assumed not to be less prone to access  
9 healthcare [30] b) the estimated effect of the two-dose schedule would only be  
10 inflated if girls less willing to complete the three-dose schedule would have been  
11 more likely to seek healthcare for condyloma than those going on to complete three  
12 doses.  
13  
14  
15  
16  
17  
18  
19  
20  
21  
22  
23  
24  
25  
26

27 Another potential limitation is that SVEVAC was a voluntary register for the period  
28 2006-2010, with only 80-85% coverage. To avoid an underestimation of vaccination  
29 exposure, we complemented missing data using the Prescribed Drug Register. This  
30 method has been used previously in a study by Herweijer et al, who found unique  
31 vaccination dose dates for 99.6% of the vaccinated girls and women in the cohort.  
32 [13]  
33  
34  
35  
36  
37  
38  
39  
40  
41  
42

43 It is also possible that individuals might have a prevalent HPV infection at time of  
44 vaccination, resulting in an underestimation of protective effect of the vaccine. We  
45 have attempted to control for this by excluding women who had a history of  
46 condyloma before the start of individual follow-up. Additionally, given that we start  
47 follow-up for condyloma incidence only after the second dose, we have the automatic  
48 benefit of a buffer period as used in.[13]  
49  
50  
51  
52  
53  
54  
55  
56  
57  
58  
59  
60

1  
2  
3 It is also of note that, the majority of women in the cohort had 0-3 months between  
4 first and second dose, which limited the power for other exposure groups in our study  
5 and resulted in wider confidence intervals, particularly in comparisons with the older  
6 age group and increasing time between doses. While we did not find socioeconomic  
7 status as a confounder in our study and we hypothesise that this is because we only  
8 follow subjects from the second dose forwards, so there has already been a large  
9 degree of self-selection with regard to the role of socioeconomic factors in our study  
10 participants.  
11  
12  
13  
14  
15  
16  
17  
18  
19

### 20 21 22 23 **Implications**

24 Reducing the number of HPV vaccine doses from three to two could potentially lead  
25 to a number of positive effects, including lower costs, increased compliance and  
26 improved logistics of the vaccination programme. It is however key to remain vigilant  
27 with regards to follow-up of disease outcomes and supplement clinical trial data and  
28 policy recommendations with real-life evidence, such as those presented here. The  
29 findings imply that the current recommendation of two dose-schedules is appropriate,  
30 but we reinforce the significance of optimal timing between doses.  
31  
32  
33  
34  
35  
36  
37  
38  
39  
40  
41  
42

### 43 **Unanswered questions and future research**

44 We did not consider HPV-related disease outcomes other than condyloma. More  
45 studies with longer follow-up time are needed to ascertain the effectiveness of a two-  
46 dose schedule for HPV-related disease outcomes such as cervical intraepithelial  
47 neoplasia or cervical cancer. As more countries implement two-dose schedules, the  
48 impact on transmission dynamics and herd immunity will also become clearer.[22] It  
49 should also be taken into account that the duration of protection for both the two-dose  
50  
51  
52  
53  
54  
55  
56  
57  
58  
59  
60

1  
2  
3 and three-dose schedule is not yet known and more time and data are required before  
4  
5 conclusions can be drawn regarding the long-term effectiveness of these schedules,  
6  
7 and a reduced-dose schedule can be recommended for girls older than 15.[2, 31]  
8  
9

10  
11 The finding that the 8+ months between doses was less protective than the 4-7 month  
12  
13 group was unexpected as for one-dose priming schedules it is often better with a  
14  
15 longer interval between doses. Since this is an observational study, we cannot exclude  
16  
17 that our finding was due to an unmeasured confounding factor however, with some  
18  
19 (unknown) underlying reason why these girls had a longer time to dose three and high  
20  
21 incidence/exposure. While we can only speculate about this higher risk in the 8+  
22  
23 month group, it has highlighted the need for further studies with a longer follow up  
24  
25 time investigating the upper time limit between doses and vaccine effectiveness.  
26  
27  
28  
29  
30

### 31 32 **Conclusion**

33  
34 For prevention of condyloma, a two-dose schedule of qHPV vaccine with 4-7 months  
35  
36 between first and second dose may be as effective as standard three-dose vaccination,  
37  
38 for women first vaccinated before the age of 20. The results from this nationwide  
39  
40 observational study support immunogenicity findings from clinical trials.  
41  
42  
43  
44  
45  
46  
47  
48  
49  
50  
51  
52  
53  
54  
55  
56  
57  
58  
59  
60

## REFERENCES

1. Schiller, J.T. and D.R. Lowy, *Raising Expectations For Subunit Vaccine*. J Infect Dis, 2014.
2. Dobson, S.R., et al., *Immunogenicity of 2 doses of HPV vaccine in younger adolescents vs 3 doses in young women: a randomized clinical trial*. JAMA, 2013. **309**(17): p. 1793-802.
3. Lazcano-Ponce, E., et al., *Overcoming barriers to HPV vaccination: non-inferiority of antibody response to human papillomavirus 16/18 vaccine in adolescents vaccinated with a two-dose vs. a three-dose schedule at 21 months*. Vaccine, 2014. **32**(6): p. 725-32.
4. Neuzil, K.M., et al., *Immunogenicity and reactogenicity of alternative schedules of HPV vaccine in Vietnam: a cluster randomized noninferiority trial*. JAMA, 2011. **305**(14): p. 1424-31.
5. Romanowski, B., et al., *Immune response to the HPV-16/18 AS04-adjuvanted vaccine administered as a 2-dose or 3-dose schedule up to 4 years after vaccination: results from a randomized study*. Hum Vaccin Immunother, 2014. **10**(5): p. 1155-65.
6. Romanowski, B., et al., *Immunogenicity and safety of the HPV-16/18 AS04-adjuvanted vaccine administered as a 2-dose schedule compared with the licensed 3-dose schedule: results from a randomized study*. Hum Vaccin, 2011. **7**(12): p. 1374-86.
7. WHO. *Human papillomavirus vaccines: WHO position paper, October 2014*. Available from: <http://www.who.int/wer/2014/wer8943.pdf?ua=1>.
8. European Medicines Agency, *Assessment report Gardasil 2014*.
9. Blomberg, M., et al., *Dose-Related Differences in Effectiveness of Human Papillomavirus Vaccination Against Genital Warts: A Nationwide Study of 550 000 Young Girls*. Clin Infect Dis, 2015.
10. Ludvigsson, J.F., et al., *The Swedish personal identity number: possibilities and pitfalls in healthcare and medical research*. Eur J Epidemiol, 2009. **24**(11): p. 659-67.
11. World Health Organisation. *International Classification of Disease, Tenth Revision*. 2010.
12. Leval, A., et al., *Quadrivalent human papillomavirus vaccine effectiveness: a Swedish national cohort study*. J Natl Cancer Inst, 2013. **105**(7): p. 469-74.
13. Herweijer, E., et al., *Association of varying number of doses of quadrivalent human papillomavirus vaccine with incidence of condyloma*. JAMA, 2014. **311**(6): p. 597-603.
14. Jensen, K.E., et al., *Women's sexual behavior. Population-based study among 65,000 women from four Nordic countries before introduction of human papillomavirus vaccination*. Acta Obstet Gynecol Scand, 2011. **90**(5): p. 459-67.
15. Donken, R., et al., *Inconclusive evidence for non-inferior immunogenicity of two- compared with three-dose HPV immunization schedules in preadolescent girls: A systematic review and meta-analysis*. J Infect, 2015. **71**(1): p. 61-73.
16. Hernandez-Avila, M., et al., *Evaluation of the immunogenicity of the quadrivalent HPV vaccine using 2 versus 3 doses at month 21: An*

- epidemiological surveillance mechanism for alternate vaccination schemes. *Hum Vaccin Immunother*, 2016. **12**(1): p. 30-8.
17. Kraiden, M., et al., *Assessment of HPV 16 and HPV 18 antibody responses by pseudovirus neutralization, Merck cLIA and Merck total IgG LIA immunoassays in a reduced dosage quadrivalent HPV vaccine trial*. *Vaccine*, 2014. **32**(5): p. 624-30.
18. Romanowski, B., et al., *Sustained immunogenicity of the HPV-16/18 AS04-adjuvanted vaccine administered as a two-dose schedule in adolescent girls: Five-year clinical data and modeling predictions from a randomized study*. *Hum Vaccin Immunother*, 2016. **12**(1): p. 20-9.
19. Safaeian, M., et al., *Durable antibody responses following one dose of the bivalent human papillomavirus L1 virus-like particle vaccine in the Costa Rica Vaccine Trial*. *Cancer Prev Res (Phila)*, 2013. **6**(11): p. 1242-50.
20. Mariani, L., et al., *Early direct and indirect impact of quadrivalent HPV (4HPV) vaccine on genital warts: a systematic review*. *Adv Ther*, 2015. **32**(1): p. 10-30.
21. Bogaards, J.A. and J. Berkhof, *Assessment of herd immunity from human papillomavirus vaccination*. *Lancet Infect Dis*, 2011. **11**(12): p. 896; author reply 896-7.
22. Donken, R., et al., *An exploration of individual- and population-level impact of the 2-dose HPV vaccination schedule in pre-adolescent girls*. *Hum Vaccin Immunother*, 2016. **12**(6): p. 1381-93.
23. Donovan, B., et al., *Quadrivalent human papillomavirus vaccination and trends in genital warts in Australia: analysis of national sentinel surveillance data*. *Lancet Infect Dis*, 2011. **11**(1): p. 39-44.
24. Smith, M.A., et al., *Fall in genital warts diagnoses in the general and indigenous Australian population following implementation of a national human papillomavirus vaccination program: analysis of routinely collected national hospital data*. *J Infect Dis*, 2015. **211**(1): p. 91-9.
25. Crowe, E., et al., *Effectiveness of quadrivalent human papillomavirus vaccine for the prevention of cervical abnormalities: case-control study nested within a population based screening programme in Australia*. *BMJ*, 2014. **348**: p. g1458.
26. Gertig, D.M., et al., *Impact of a population-based HPV vaccination program on cervical abnormalities: a data linkage study*. *BMC Med*, 2013. **11**: p. 227.
27. Herweijer, E., et al., *Quadrivalent HPV vaccine effectiveness against high-grade cervical lesions by age at vaccination: A population-based study*. *Int J Cancer*, 2016. **138**(12): p. 2867-74.
28. Svahn, M.F., et al., *Burden and incidence of human papillomavirus-associated cancers and precancerous lesions in Denmark*. *Scand J Public Health*, 2016. **44**(6): p. 551-9.
29. Garland, S.M., et al., *Impact and Effectiveness of the Quadrivalent Human Papillomavirus Vaccine: A Systematic Review of 10 Years of Real-world Experience*. *Clin Infect Dis*, 2016. **63**(4): p. 519-27.
30. Herweijer, E., et al., *The Participation of HPV-Vaccinated Women in a National Cervical Screening Program: Population-Based Cohort Study*. *PLoS One*, 2015. **10**(7): p. e0134185.

1  
2  
3  
4  
5  
6  
7  
8  
9  
10  
11  
12  
13  
14  
15  
16  
17  
18  
19  
20  
21  
22  
23  
24  
25  
26  
27  
28  
29  
30  
31  
32  
33  
34  
35  
36  
37  
38  
39  
40  
41  
42  
43  
44  
45  
46  
47  
48  
49  
50  
51  
52  
53  
54  
55  
56  
57  
58  
59  
60

31. Jit, M., et al., *Comparison of two dose and three dose human papillomavirus vaccine schedules: cost effectiveness analysis based on transmission model.* BMJ, 2015. **350**: p. g7584.

For peer review only

1  
2  
3 Figure 1. Details on study exclusions and the population analysed to investigate  
4 timing of two versus three doses of quadrivalent HPV vaccine and associated  
5 effectiveness against condyloma.  
6  
7  
8  
9  
10  
11  
12  
13  
14  
15  
16  
17  
18  
19  
20  
21  
22  
23  
24  
25  
26  
27  
28  
29  
30  
31  
32  
33  
34  
35  
36  
37  
38  
39  
40  
41  
42  
43  
44  
45  
46  
47  
48  
49  
50  
51  
52  
53  
54  
55  
56  
57  
58  
59  
60



1  
2  
3  
4  
5  
6  
7  
8  
9  
10  
11  
12  
13  
14  
15  
16  
17  
18  
19  
20  
21  
22  
23  
24  
25  
26  
27  
28  
29  
30  
31  
32  
33  
34  
35  
36  
37  
38  
39  
40  
41  
42  
43  
44  
45  
46  
47  
48  
49  
50  
51  
52  
53  
54  
55  
56  
57  
58  
59  
60



210x297mm (300 x 300 DPI)

Supplementary Table 1. IR, IRR, and IRD comparing 2 versus 3 dose vaccination by age at vaccination initiation and time between dose 1 and 2, adjusted for attained age and education level¶.

| Age at first vaccination | Number of doses | Time between dose 1 and 2 (months) | IR, 95%CI*    | P-value | IRR, 95%CI       | P-value | IRD, 95%CI*   | P-value |
|--------------------------|-----------------|------------------------------------|---------------|---------|------------------|---------|---------------|---------|
| ≤16yr                    | 3 doses         | Standard dosing schedule (0, 2, 6) | 62 (53;72)    | <0.001  | Ref              | Ref     | Ref           | Ref     |
|                          | 2 doses         | 0-3                                | 122 (89;155)  | <0.001  | 1.96 (1.43;2.70) | <0.001  | 60 (25;95)    | 0.001   |
|                          |                 | 4-7                                | 73 (19;128)   | 0.008   | 1.17 (0.55;2.51) | 0.669   | 11 (-44;66)   | 0.692   |
|                          |                 | 8+                                 | 250 (49;450)  | 0.015   | 4.02 (1.78;9.07) | 0.001   | 188 (13;388)  | 0.067   |
| 17-19yr                  | 3 doses         | Standard dosing schedule (0, 2, 6) | 113 (90;135)  | <0.001  | Ref              | Ref     | Ref           | Ref     |
|                          | 2 doses         | 0-3                                | 244 (189;299) | <0.001  | 2.15 (1.63;2.84) | <0.001  | 131 (75;186)  | <0.001  |
|                          |                 | 4-7                                | 100 (19;181)  | 0.015   | 0.88 (0.39;2.00) | 0.767   | -13 (-95;69)  | 0.754   |
|                          |                 | 8+                                 | 383 (73;694)  | 0.016   | 3.39 (1.50;7.68) | 0.003   | 270 (-39;579) | 0.087   |

\*IR, IRD reported per 100 000 person-years. Reference groups: ≤16yr with 3 doses of qHPV (0,2,6 months) and 17-19yr with 3 doses of qHPV (0,2,6 months).

¶ Highest education level of either parent, nearest to the date of entry, was used as a proxy for socioeconomic status. Individuals with educational information (n=252 768).

Supplementary Table 2. IR, IRR, and IRD comparing 2 versus 3 dose vaccination by age at vaccination initiation and time between dose 1 and 2.

| Age at first vaccination | Number of doses | Time between dose 1 and 2 (months) | IR, 95%CI*    | P-value | IRR, 95%CI       | P-value   | IRD, 95%CI*   | P-value   |
|--------------------------|-----------------|------------------------------------|---------------|---------|------------------|-----------|---------------|-----------|
| ≤16yr                    | 3 doses         | Overall (0-3;4-7;8+)               | 64 (55;72)    | <0.001  | Reference        | Reference | Reference     | Reference |
|                          | 2 doses         | 0-3                                | 123 (90;156)  | <0.001  | 1.92 (1.42;2.60) | <0.001    | 59 (25;93)    | 0.001     |
|                          |                 | 4-7                                | 79 (24;133)   | 0.005   | 1.23 (0.61;2.49) | 0.562     | 15 (-40;70)   | 0.598     |
|                          |                 | 8+                                 | 270 (70;470)  | 0.008   | 4.22 (1.99;8.94) | <0.001    | 206 (6;406)   | 0.044     |
| 17-19yr                  | 3 doses         | Overall (0-3;4-7;8+)               | 127 (106;149) | <0.001  | Reference        | Reference | Reference     | Reference |
|                          | 2 doses         | 0-3                                | 242 (190;294) | <0.001  | 1.9 (1.48;2.45)  | <0.001    | 115 (62;168)  | <0.001    |
|                          |                 | 4-7                                | 95 (19;172)   | 0.015   | 0.75 (0.33;1.69) | 0.484     | -32 (-110;46) | 0.422     |
|                          |                 | 8+                                 | 374 (72;675)  | 0.015   | 2.93 (1.3;6.61)  | 0.009     | 246 (-54;547) | 0.108     |

\* IR, IRD reported per 100 000 person-years, reference groups: ≤16yr with 3 doses of qHPV (no time restriction between dose 1 and 1 and dose 2 and 3) and 17-19yrs with 3 doses of qHPV (no time restriction between dose 1 and 1 and dose 2 and 3).

STROBE 2007 (v4) Statement—Checklist of items that should be included in reports of *cohort studies*

| Section/Topic                | Item # | Recommendation                                                                                                                                                                       | Reported on page # |
|------------------------------|--------|--------------------------------------------------------------------------------------------------------------------------------------------------------------------------------------|--------------------|
| Title and abstract           | 1      | (a) Indicate the study's design with a commonly used term in the title or the abstract                                                                                               | 1, 2               |
|                              |        | (b) Provide in the abstract an informative and balanced summary of what was done and what was found                                                                                  | 2                  |
| <b>Introduction</b>          |        |                                                                                                                                                                                      |                    |
| Background/rationale         | 2      | Explain the scientific background and rationale for the investigation being reported                                                                                                 | 5, 6               |
| Objectives                   | 3      | State specific objectives, including any prespecified hypotheses                                                                                                                     | 6                  |
| <b>Methods</b>               |        |                                                                                                                                                                                      |                    |
| Study design                 | 4      | Present key elements of study design early in the paper                                                                                                                              | 6                  |
| Setting                      | 5      | Describe the setting, locations, and relevant dates, including periods of recruitment, exposure, follow-up, and data collection                                                      | 6, 7, 8            |
| Participants                 | 6      | (a) Give the eligibility criteria, and the sources and methods of selection of participants. Describe methods of follow-up                                                           | 6, 7, 8            |
|                              |        | (b) For matched studies, give matching criteria and number of exposed and unexposed                                                                                                  | N/A                |
| Variables                    | 7      | Clearly define all outcomes, exposures, predictors, potential confounders, and effect modifiers. Give diagnostic criteria, if applicable                                             | 6, 7, 8, 9         |
| Data sources/<br>measurement | 8*     | For each variable of interest, give sources of data and details of methods of assessment (measurement). Describe comparability of assessment methods if there is more than one group | 7                  |
| Bias                         | 9      | Describe any efforts to address potential sources of bias                                                                                                                            | 6                  |
| Study size                   | 10     | Explain how the study size was arrived at                                                                                                                                            | 6                  |
| Quantitative variables       | 11     | Explain how quantitative variables were handled in the analyses. If applicable, describe which groupings were chosen and why                                                         | 8, 9               |
| Statistical methods          | 12     | (a) Describe all statistical methods, including those used to control for confounding                                                                                                | 8, 9               |
|                              |        | (b) Describe any methods used to examine subgroups and interactions                                                                                                                  | 8, 9               |
|                              |        | (c) Explain how missing data were addressed                                                                                                                                          | N/A                |
|                              |        | (d) If applicable, explain how loss to follow-up was addressed                                                                                                                       | N/A                |
|                              |        | (e) Describe any sensitivity analyses                                                                                                                                                | 9                  |
| <b>Results</b>               |        |                                                                                                                                                                                      |                    |

|                          |     |                                                                                                                                                                                                              |                |
|--------------------------|-----|--------------------------------------------------------------------------------------------------------------------------------------------------------------------------------------------------------------|----------------|
| Participants             | 13* | (a) Report numbers of individuals at each stage of study—eg numbers potentially eligible, examined for eligibility, confirmed eligible, included in the study, completing follow-up, and analysed            | 6, 9, 10       |
|                          |     | (b) Give reasons for non-participation at each stage                                                                                                                                                         | 6              |
|                          |     | (c) Consider use of a flow diagram                                                                                                                                                                           | 6              |
| Descriptive data         | 14* | (a) Give characteristics of study participants (eg demographic, clinical, social) and information on exposures and potential confounders                                                                     |                |
|                          |     | (b) Indicate number of participants with missing data for each variable of interest                                                                                                                          | N/A            |
|                          |     | (c) Summarise follow-up time (eg, average and total amount)                                                                                                                                                  | 9, 10          |
| Outcome data             | 15* | Report numbers of outcome events or summary measures over time                                                                                                                                               | 9, 10          |
| Main results             | 16  | (a) Give unadjusted estimates and, if applicable, confounder-adjusted estimates and their precision (eg, 95% confidence interval). Make clear which confounders were adjusted for and why they were included | 10-18          |
|                          |     | (b) Report category boundaries when continuous variables were categorized                                                                                                                                    | N/A            |
|                          |     | (c) If relevant, consider translating estimates of relative risk into absolute risk for a meaningful time period                                                                                             | N/A            |
| Other analyses           | 17  | Report other analyses done—eg analyses of subgroups and interactions, and sensitivity analyses                                                                                                               | 15, 18         |
| <b>Discussion</b>        |     |                                                                                                                                                                                                              |                |
| Key results              | 18  | Summarise key results with reference to study objectives                                                                                                                                                     | 18             |
| <b>Limitations</b>       |     |                                                                                                                                                                                                              |                |
| Interpretation           | 20  | Give a cautious overall interpretation of results considering objectives, limitations, multiplicity of analyses, results from similar studies, and other relevant evidence                                   | 19, 20, 21, 22 |
| Generalisability         | 21  | Discuss the generalisability (external validity) of the study results                                                                                                                                        | 20, 21, 22     |
| <b>Other information</b> |     |                                                                                                                                                                                                              |                |
| Funding                  | 22  | Give the source of funding and the role of the funders for the present study and, if applicable, for the original study on which the present article is based                                                | 3              |

\*Give information separately for cases and controls in case-control studies and, if applicable, for exposed and unexposed groups in cohort and cross-sectional studies.

**Note:** An Explanation and Elaboration article discusses each checklist item and gives methodological background and published examples of transparent reporting. The STROBE checklist is best used in conjunction with this article (freely available on the Web sites of PLoS Medicine at <http://www.plosmedicine.org/>, Annals of Internal Medicine at <http://www.annals.org/>, and Epidemiology at <http://www.epidem.com/>). Information on the STROBE Initiative is available at [www.strobe-statement.org](http://www.strobe-statement.org).
