# Supplementary material for: Timing of two versus three doses of quadrivalent HPV vaccine and associated effectiveness against condyloma in Sweden: a nationwide cohort study
Source: PubMed Central journal article supplement — BMJ Open. 2017 Jun 8;7(6):e015021. doi: 10.1136/bmjopen-2016-015021 (PMC5734289; doi:10.1136/bmjopen-2016-015021), 2017-06-08
Supplement: bmjopen-2016-015021supp002.pdf [file bmjopen-2016-015021supp002.pdf]

Supplementary Table 2. IR, IRR, and IRD comparing 2 versus 3 dose vaccination by age at vaccination initiation and time between dose 1 and 2.

| <b>Age at first vaccination</b> | <b>Number of doses</b> | <b>Time between dose 1 and 2 (months)</b> | <b>IR, 95%CI*</b> | <b>P-value</b> | <b>IRR, 95%CI</b> | <b>P-value</b> | <b>IRD, 95%CI*</b> | <b>P-value</b> |
|---------------------------------|------------------------|-------------------------------------------|-------------------|----------------|-------------------|----------------|--------------------|----------------|
| ≤16yr                           | 3 doses                | Overall (0-3;4-7;8+)                      | 64 (55;72)        | <0.001         | Reference         | Reference      | Reference          | Reference      |
|                                 | 2 doses                | 0-3                                       | 123 (90;156)      | <0.001         | 1.92 (1.42;2.60)  | <0.001         | 59 (25;93)         | 0.001          |
|                                 |                        | 4-7                                       | 79 (24;133)       | 0.005          | 1.23 (0.61;2.49)  | 0.562          | 15 (-40;70)        | 0.598          |
|                                 |                        | 8+                                        | 270 (70;470)      | 0.008          | 4.22 (1.99;8.94)  | <0.001         | 206 (6;406)        | 0.044          |
| 17-19yr                         | 3 doses                | Overall (0-3;4-7;8+)                      | 127 (106;149)     | <0.001         | Reference         | Reference      | Reference          | Reference      |
|                                 | 2 doses                | 0-3                                       | 242 (190;294)     | <0.001         | 1.9 (1.48;2.45)   | <0.001         | 115 (62;168)       | <0.001         |
|                                 |                        | 4-7                                       | 95 (19;172)       | 0.015          | 0.75 (0.33;1.69)  | 0.484          | -32 (-110;46)      | 0.422          |
|                                 |                        | 8+                                        | 374 (72;675)      | 0.015          | 2.93 (1.3;6.61)   | 0.009          | 246 (-54;547)      | 0.108          |

\* IR, IRD reported per 100 000 person-years, reference groups: ≤16yr with 3 doses of qHPV (no time restriction between dose 1 and 1 and dose 2 and 3) and 17-19yrs with 3 doses of qHPV (no time restriction between dose 1 and 1 and dose 2 and 3).
